# Supplementary material
Source: publisher site journal article supplement (http://dovepress.com/cr_data/supplementary_file_51041.pdf)
Supplement: Supplementary file 1 [file supplementary_file_51041.pdf]

| SYMBOL   | CPG        | beta case avg | beta control avg | statistic |
|----------|------------|---------------|------------------|-----------|
| APEX2    | cg00145348 | 0.304378043   | 0.525155809      | 4         |
| APEX2    | cg05961595 | 0.086223841   | 0.391721523      | 0         |
| AR       | cg21966410 | 0.165473217   | 0.442882615      | 5         |
| ARAF     | cg10455133 | 0.161405482   | 0.377744027      | 3         |
| ARMCX2   | cg19055639 | 0.243267762   | 0.469073221      | 4         |
| ARMCX4   | cg20085077 | 0.148357351   | 0.448889984      | 3         |
| ATP6AP1  | cg18742441 | 0.251936481   | 0.579558783      | 4         |
| ATP6AP2  | cg06731599 | 0.234928945   | 0.440567345      | 1         |
| BCORL1   | cg23269489 | 0.177700273   | 0.452990623      | 1         |
| BEX1     | cg21509846 | 0.248093251   | 0.456332464      | 5         |
| BEX1     | cg23936476 | 0.216536417   | 0.508821366      | 4         |
| CCDC22   | cg26606552 | 0.169091479   | 0.391232317      | 0         |
| CHRDL1   | cg05921207 | 0.159465331   | 0.378257517      | 5         |
| CXorf17  | cg04944936 | 0.224055191   | 0.432080854      | 0         |
| CXorf34  | cg13286902 | 0.212864925   | 0.484243372      | 5         |
| DXS9879E | cg20641280 | 0.348963779   | 0.615338396      | 0         |
| EBP      | cg13771629 | 0.164444754   | 0.425900556      | 4         |
| EFNB1    | cg04907664 | 0.263685845   | 0.480712929      | 4         |
| EFNB1    | cg15977272 | 0.190310963   | 0.557484275      | 4         |
| EFNB1    | cg23545272 | 0.180778395   | 0.517216093      | 3         |
| ELF4     | cg06428055 | 0.180094512   | 0.437961331      | 4         |
| EMD      | cg09229960 | 0.095908109   | 0.560263425      | 1         |
| ESX1     | cg04721883 | 0.271735193   | 0.491698969      | 5         |
| FAM11A   | cg21030483 | 0.171941029   | 0.431038485      | 4         |
| FAM3A    | cg23698956 | 0.165340271   | 0.399881743      | 3         |
| FAM58A   | cg01140782 | 0.12326633    | 0.387522994      | 4         |
| FHL1     | cg14506668 | 0.236270414   | 0.443527637      | 4         |
| FLJ10178 | cg03057808 | 0.168680352   | 0.400217251      | 4         |
| FLJ30058 | cg24813163 | 0.180266345   | 0.444843904      | 3         |
| FMR1     | cg08434396 | 0.243858603   | 0.490003472      | 0         |
| FTSJ1    | cg06489418 | 0.286942932   | 0.577463477      | 4         |
| FUNDC2   | cg21697779 | 0.185036681   | 0.425358975      | 3         |
| G6PD     | cg12536534 | 0.17148449    | 0.445852352      | 1         |
| GK       | cg15636587 | 0.111602098   | 0.417954521      | 1         |
| GLT28D1  | cg19963797 | 0.136983004   | 0.40076927       | 2         |
| GNL3L    | cg10318351 | 0.157282069   | 0.396195388      | 2         |
| GPC4     | cg08798116 | 0.097173207   | 0.411775381      | 2         |
| GPRASP2  | cg23066860 | 0.196610735   | 0.407603926      | 1         |
| GRIA3    | cg23424962 | 0.224118391   | 0.486331128      | 3         |
| HMGB3    | cg05935584 | 0.143363298   | 0.555679439      | 4         |
| HTATSF1  | cg09923855 | 0.159923557   | 0.451902157      | 4         |
| IDH3G    | cg27271445 | 0.1591432     | 0.434428052      | 5         |
| LAMP2    | cg18307604 | 0.193233245   | 0.47666536       | 4         |
| LDOC1    | cg20104776 | 0.350885507   | 0.598905037      | 1         |
| LONRF3   | cg06944050 | 0.178982692   | 0.410301992      | 5         |
| LRP5     | cg21115990 | 0.196765586   | 0.520013937      | 4         |
| MAOA     | cg15014034 | 0.210766446   | 0.487646532      | 5         |
| MAOA     | cg19441691 | 0.138548779   | 0.344942246      | 3         |
| MED12    | cg21693321 | 0.237428295   | 0.502640439      | 5         |
| MID1IP1  | cg21888438 | 0.178615057   | 0.383851658      | 5         |
| MID2     | cg19771541 | 0.153746525   | 0.384310089      | 5         |
| MPP1     | cg25813820 | 0.139703872   | 0.464287783      | 2         |
| MTCP1    | cg24341236 | 0.151009226   | 0.453832534      | 5         |
| MTMR1    | cg23947872 | 0.21833549    | 0.497888585      | 4         |
| NAP1L2   | cg04297329 | 0.290915069   | 0.493751231      | 3         |
| NHS      | cg14345281 | 0.21174874    | 0.419606741      | 1         |
| OCRL     | cg21365235 | 0.19689435    | 0.488781346      | 5         |
| OTUD5    | cg09928375 | 0.211600623   | 0.571535129      | 1         |
| PDK3     | cg18256128 | 0.260932572   | 0.490686479      | 3         |
| PDK3     | cg18414950 | 0.187498946   | 0.533587446      | 4         |
| PHKA1    | cg11806565 | 0.21734436    | 0.431896887      | 1         |
| PHKA1    | cg20816612 | 0.326796695   | 0.558035836      | 4         |
| PHKA2    | cg06700462 | 0.084757912   | 0.456942204      | 0         |
| PLXNA3   | cg07428182 | 0.258011478   | 0.549816068      | 1         |
| PORCN    | cg08785133 | 0.127244496   | 0.429593456      | 1         |
| RAB33A   | cg24340926 | 0.244906898   | 0.504783677      | 2         |

|               |            |             |             |   |
|---------------|------------|-------------|-------------|---|
| RBMX          | cg12517167 | 0.17545547  | 0.440471369 | 4 |
| RBMX2         | cg26655138 | 0.209321879 | 0.505485972 | 4 |
| RP11-311P8.3  | cg19011603 | 0.242817404 | 0.460233588 | 1 |
| RP13-360B22.2 | cg07911663 | 0.276739848 | 0.519803864 | 4 |
| RP2           | cg24511534 | 0.238243269 | 0.473737938 | 5 |
| RPGR          | cg25933726 | 0.203449146 | 0.495773542 | 4 |
| RPL36A        | cg18507125 | 0.272709406 | 0.521253815 | 5 |
| RPS6KA3       | cg19696622 | 0.149529089 | 0.351029127 | 2 |
| SCML2         | cg08300622 | 0.197497502 | 0.419489336 | 5 |
| SCML2         | cg26246138 | 0.06003286  | 0.431944554 | 2 |
| SLC35A2       | cg14132995 | 0.163863558 | 0.413026678 | 1 |
| SLC9A7        | cg18799866 | 0.144533121 | 0.47016249  | 4 |
| SNX12         | cg14892037 | 0.159835515 | 0.3684968   | 3 |
| SOX3          | cg02847500 | 0.230237938 | 0.473383018 | 4 |
| SYN1          | cg05254049 | 0.402120748 | 0.609487246 | 4 |
| TFE3          | cg01241836 | 0.192984511 | 0.424319917 | 2 |
| USP11         | cg25316166 | 0.169342239 | 0.378322956 | 4 |
| USP51         | cg25424556 | 0.106648838 | 0.346664469 | 1 |
| UXT           | cg19206010 | 0.25807478  | 0.477079958 | 0 |
| WDR44         | cg13674559 | 0.160607581 | 0.389307809 | 5 |
| ZDHHC15       | cg11272332 | 0.217129608 | 0.420221629 | 5 |
| ZMYM3         | cg25226891 | 0.099358734 | 0.413846898 | 4 |
| ZNF41         | cg01887353 | 0.124544434 | 0.352518963 | 5 |
| ZNF449        | cg19392138 | 0.156177403 | 0.36951108  | 5 |

| pvalue      | raw pvalue  | beta change  | status          |
|-------------|-------------|--------------|-----------------|
| 0.025974026 | 0.025974026 | -0.220777766 | hypomethylation |
| 0.002164502 | 0.002164502 | -0.305497682 | hypomethylation |
| 0.041125541 | 0.041125541 | -0.277409398 | hypomethylation |
| 0.015151515 | 0.015151515 | -0.216338545 | hypomethylation |
| 0.025974026 | 0.025974026 | -0.225805459 | hypomethylation |
| 0.015151515 | 0.015151515 | -0.300532633 | hypomethylation |
| 0.025974026 | 0.025974026 | -0.327622302 | hypomethylation |
| 0.004329004 | 0.004329004 | -0.2056384   | hypomethylation |
| 0.004329004 | 0.004329004 | -0.27529035  | hypomethylation |
| 0.041125541 | 0.041125541 | -0.208239213 | hypomethylation |
| 0.025974026 | 0.025974026 | -0.292284949 | hypomethylation |
| 0.002164502 | 0.002164502 | -0.222140838 | hypomethylation |
| 0.041125541 | 0.041125541 | -0.218792186 | hypomethylation |
| 0.002164502 | 0.002164502 | -0.208025663 | hypomethylation |
| 0.041125541 | 0.041125541 | -0.271378447 | hypomethylation |
| 0.002164502 | 0.002164502 | -0.266374617 | hypomethylation |
| 0.025974026 | 0.025974026 | -0.261455802 | hypomethylation |
| 0.025974026 | 0.025974026 | -0.217027084 | hypomethylation |
| 0.025974026 | 0.025974026 | -0.367173312 | hypomethylation |
| 0.015151515 | 0.015151515 | -0.336437698 | hypomethylation |
| 0.025974026 | 0.025974026 | -0.257866819 | hypomethylation |
| 0.004329004 | 0.004329004 | -0.464355316 | hypomethylation |
| 0.041125541 | 0.041125541 | -0.219963776 | hypomethylation |
| 0.025974026 | 0.025974026 | -0.259097456 | hypomethylation |
| 0.015151515 | 0.015151515 | -0.234541472 | hypomethylation |
| 0.025974026 | 0.025974026 | -0.264256664 | hypomethylation |
| 0.025974026 | 0.025974026 | -0.207257223 | hypomethylation |
| 0.025974026 | 0.025974026 | -0.231536899 | hypomethylation |
| 0.015151515 | 0.015151515 | -0.264577559 | hypomethylation |
| 0.002164502 | 0.002164502 | -0.246144869 | hypomethylation |
| 0.025974026 | 0.025974026 | -0.290520545 | hypomethylation |
| 0.015151515 | 0.015151515 | -0.240322294 | hypomethylation |
| 0.004329004 | 0.004329004 | -0.274367862 | hypomethylation |
| 0.004329004 | 0.004329004 | -0.306352423 | hypomethylation |
| 0.008658009 | 0.008658009 | -0.263786266 | hypomethylation |
| 0.008658009 | 0.008658009 | -0.238913319 | hypomethylation |
| 0.008658009 | 0.008658009 | -0.314602174 | hypomethylation |
| 0.004329004 | 0.004329004 | -0.210993191 | hypomethylation |
| 0.015151515 | 0.015151515 | -0.262212737 | hypomethylation |
| 0.025974026 | 0.025974026 | -0.412316141 | hypomethylation |
| 0.025974026 | 0.025974026 | -0.2919786   | hypomethylation |
| 0.041125541 | 0.041125541 | -0.275284852 | hypomethylation |
| 0.025974026 | 0.025974026 | -0.283432115 | hypomethylation |
| 0.004329004 | 0.004329004 | -0.24801953  | hypomethylation |
| 0.041125541 | 0.041125541 | -0.2313193   | hypomethylation |
| 0.025974026 | 0.025974026 | -0.323248351 | hypomethylation |
| 0.041125541 | 0.041125541 | -0.276880086 | hypomethylation |
| 0.015151515 | 0.015151515 | -0.206393467 | hypomethylation |
| 0.041125541 | 0.041125541 | -0.265212144 | hypomethylation |
| 0.041125541 | 0.041125541 | -0.205236601 | hypomethylation |
| 0.041125541 | 0.041125541 | -0.230563564 | hypomethylation |
| 0.008658009 | 0.008658009 | -0.324583911 | hypomethylation |
| 0.041125541 | 0.041125541 | -0.302823308 | hypomethylation |
| 0.025974026 | 0.025974026 | -0.279553095 | hypomethylation |
| 0.015151515 | 0.015151515 | -0.202836162 | hypomethylation |
| 0.004329004 | 0.004329004 | -0.207858001 | hypomethylation |
| 0.041125541 | 0.041125541 | -0.291886996 | hypomethylation |
| 0.004329004 | 0.004329004 | -0.359934506 | hypomethylation |
| 0.015151515 | 0.015151515 | -0.229753907 | hypomethylation |
| 0.025974026 | 0.025974026 | -0.3460885   | hypomethylation |
| 0.004329004 | 0.004329004 | -0.214552527 | hypomethylation |
| 0.025974026 | 0.025974026 | -0.231239141 | hypomethylation |
| 0.002164502 | 0.002164502 | -0.372184292 | hypomethylation |
| 0.004329004 | 0.004329004 | -0.29180459  | hypomethylation |
| 0.004329004 | 0.004329004 | -0.30234896  | hypomethylation |
| 0.008658009 | 0.008658009 | -0.259876779 | hypomethylation |

|             |             |              |                 |
|-------------|-------------|--------------|-----------------|
| 0.025974026 | 0.025974026 | -0.265015899 | hypomethylation |
| 0.025974026 | 0.025974026 | -0.296164093 | hypomethylation |
| 0.004329004 | 0.004329004 | -0.217416184 | hypomethylation |
| 0.025974026 | 0.025974026 | -0.243064016 | hypomethylation |
| 0.041125541 | 0.041125541 | -0.235494669 | hypomethylation |
| 0.025974026 | 0.025974026 | -0.292324396 | hypomethylation |
| 0.041125541 | 0.041125541 | -0.248544409 | hypomethylation |
| 0.008658009 | 0.008658009 | -0.201500038 | hypomethylation |
| 0.041125541 | 0.041125541 | -0.221991834 | hypomethylation |
| 0.008658009 | 0.008658009 | -0.371911694 | hypomethylation |
| 0.004329004 | 0.004329004 | -0.24916312  | hypomethylation |
| 0.025974026 | 0.025974026 | -0.325629369 | hypomethylation |
| 0.015151515 | 0.015151515 | -0.208661285 | hypomethylation |
| 0.025974026 | 0.025974026 | -0.24314508  | hypomethylation |
| 0.025974026 | 0.025974026 | -0.207366498 | hypomethylation |
| 0.008658009 | 0.008658009 | -0.231335406 | hypomethylation |
| 0.025974026 | 0.025974026 | -0.208980717 | hypomethylation |
| 0.004329004 | 0.004329004 | -0.240015631 | hypomethylation |
| 0.002164502 | 0.002164502 | -0.219005178 | hypomethylation |
| 0.041125541 | 0.041125541 | -0.228700228 | hypomethylation |
| 0.041125541 | 0.041125541 | -0.203092021 | hypomethylation |
| 0.025974026 | 0.025974026 | -0.314488164 | hypomethylation |
| 0.041125541 | 0.041125541 | -0.227974529 | hypomethylation |
| 0.041125541 | 0.041125541 | -0.213333677 | hypomethylation |

| SYMBOL    | CPG        | CHR | MAPINFO   | CPG ISLAND | CPG ISLAND LOCATIONS   |
|-----------|------------|-----|-----------|------------|------------------------|
| ZNF124    | cg21918500 | 1   | 245402094 | TRUE       | 1:245401260-245402151  |
| TTL7      | cg03098721 | 1   | 84236672  | TRUE       | 1:84236652-84237966    |
| BCAN      | cg21475402 | 1   | 154878764 | TRUE       | 1:154878094-154879230  |
| CNIH3     | cg00290506 | 1   | 222870849 | TRUE       | 1:222870113-222872558  |
| SRD5A2    | cg15403517 | 2   | 31659779  | TRUE       | 2:31658633-31660643    |
| EN1       | cg22231902 | 2   | 119321371 | TRUE       | 2:119320039-119321504  |
| TRPC1     | cg24794531 | 3   | 143926527 | TRUE       | 3:143925285-143926748  |
| EIF5A2    | cg26209058 | 3   | 172109215 | TRUE       | 3:172108452-172109716  |
| PEX5L     | cg21176048 | 3   | 181237929 | TRUE       | 3:181236808-181238032  |
| CRMP1     | cg03544320 | 4   | 5945592   | TRUE       | 4:5944246-5946191      |
| POU4F2    | cg13262687 | 4   | 147779029 | TRUE       | 4:147778503-147781596  |
| CART      | cg23300372 | 5   | 71051188  | TRUE       | 5:71050507-71051626    |
| IRF4      | cg12741420 | 6   | 337131    | TRUE       | 6:336092-339080        |
| SNX9      | cg26845300 | 6   | 158163821 | TRUE       | 6:158163446-158165173  |
| HIST1H2BI | cg02192855 | 6   | 26381178  | TRUE       | 6:26381046-26381970    |
| ZNF96     | cg02622316 | 6   | 28475389  | TRUE       | 6:28474985-28475928    |
| HIST1H3D  | cg08307092 | 6   | 26308153  | TRUE       | 6:26307702-26308258    |
| HIST1H4E  | cg16706631 | 6   | 26312802  | TRUE       | 6:26312577-26313287    |
| ACTL6B    | cg08572611 | 7   | 100091850 | TRUE       | 7:100091590-100092362  |
| GATA4     | cg00090147 | 8   | 11599776  | TRUE       | 8:11598711-11600557    |
| NEF3      | cg18267374 | 8   | 24827178  | TRUE       | 8:24826692-24829288    |
| ADRB3     | cg17619823 | 8   | 37942632  | TRUE       | 8:37941431-37943204    |
| GATA4     | cg08369065 | 8   | 11600092  | TRUE       | 8:11598711-11600557    |
| LHX2      | cg07109287 | 9   | 125813894 | TRUE       | 9:125813052-125815466  |
| HTR7      | cg06291867 | 10  | 92607142  | TRUE       | 10:92606622-92608182   |
| INA       | cg23642747 | 10  | 105026635 | TRUE       | 10:105026442-105028852 |
| GAD2      | cg04599297 | 10  | 26545448  | TRUE       | 10:26543757-26547625   |
| EGR2      | cg19355190 | 10  | 64245804  | TRUE       | 10:64244521-64245891   |
| PRAP1     | cg03743584 | 10  | 135010898 | FALSE      |                        |
| FLJ46831  | cg19884262 | 10  | 129425958 | TRUE       | 10:129424072-129426344 |
| CYP2E1    | cg13315147 | 10  | 135191518 | TRUE       | 10:135191138-135192648 |
| C10orf125 | cg12251804 | 10  | 135021073 | TRUE       | 10:135020610-135021994 |
| INA       | cg25764191 | 10  | 105027205 | TRUE       | 10:105026442-105028852 |
| WT1       | cg16092786 | 11  | 32412311  | TRUE       | 11:32411271-32413831   |
| FOXB1     | cg22777952 | 15  | 58083717  | TRUE       | 15:58083184-58086207   |
| FOXB1     | cg08583049 | 15  | 58084107  | TRUE       | 15:58083184-58086207   |
| HS3ST2    | cg19064258 | 16  | 22733618  | TRUE       | 16:22732005-22734135   |
| IRF8      | cg24826867 | 16  | 84490354  | TRUE       | 16:84489299-84490591   |
| MGAT5B    | cg00654814 | 17  | 72376663  | TRUE       | 17:72375680-72377919   |
| RND2      | cg05270634 | 17  | 38430971  | TRUE       | 17:38429704-38431262   |
| GAS7      | cg22471346 | 17  | 10042198  | TRUE       | 17:10041659-10043517   |
| HOXB13    | cg21842478 | 17  | 44161045  | TRUE       | 17:44160495-44161328   |
| CA4       | cg04532952 | 17  | 55582527  | TRUE       | 17:55581878-55583315   |
| GALR1     | cg04534765 | 18  | 73091357  | TRUE       | 18:73090255-73093032   |
| F2RL3     | cg19006008 | 19  | 16860768  | FALSE      |                        |
| GNA11     | cg14917512 | 19  | 3045685   | TRUE       | 19:3044235-3046095     |
| EDN3      | cg04048259 | 20  | 57308741  | TRUE       | 20:57308563-57309693   |
| SYNGR1    | cg19713460 | 22  | 38075476  | TRUE       | 22:38075299-38076737   |
| S100A9    | cg16139316 | 1   | 151597382 | FALSE      |                        |
| HK2       | cg18638581 | 2   | 74913110  | FALSE      |                        |
| GNLY      | cg11752275 | 2   | 85774547  | FALSE      |                        |
| CPA3      | cg13424229 | 3   | 150064527 | FALSE      |                        |
| C3orf60   | cg07109801 | 3   | 49032665  | TRUE       | 3:49032563-49032797    |
| CFB       | cg17741572 | 6   | 32022284  | FALSE      |                        |
| FURIN     | cg26377677 | 15  | 89213122  | FALSE      |                        |
| SLC16A3   | cg14417329 | 17  | 77779562  | TRUE       | 17:77779304-77780821   |
| SDCBP2    | cg16173067 | 20  | 1257722   | FALSE      |                        |
| BCAP31    | cg02205962 |     | 152643001 | TRUE       | X:152642005-152643632  |

|               |            |
|---------------|------------|
| TSPYL2        | cg24779040 |
| SLC9A6        | cg08695223 |
| PRDX4         | cg07581973 |
| PHF16         | cg19194595 |
| RPL10         | cg18923230 |
| EDA           | cg20540913 |
| PGRMC1        | cg07876586 |
| ELF4          | cg04544154 |
| WDR45         | cg17552650 |
| PHF8          | cg09920632 |
| MGC39606      | cg17231524 |
| RP1-112K5.2   | cg20504202 |
| NDUFA1        | cg14541939 |
| GPC3          | cg07297906 |
| SLC9A7        | cg14841098 |
| RP13-360B22.2 | cg11839979 |
| ELK1          | cg21860846 |
| BCORL1        | cg18535534 |
| TMEM29        | cg03936963 |
| BEX2          | cg12549513 |
| OPHN1         | cg04702045 |
| HADH2         | cg04241572 |
| WWC3          | cg12064213 |
| OTUD5         | cg18780401 |
| POLA          | cg14520892 |
| HTATSF1       | cg19949137 |
| ZBTB33        | cg02649608 |
| WDR13         | cg25053301 |
| RNF113A       | cg23180270 |
| FLJ20298      | cg04238548 |
| RBMX          | cg14642832 |
| PRAF2         | cg14368286 |
| TMSB4X        | cg21400640 |
| CXorf26       | cg25591670 |
| FSHPRH1       | cg14743649 |
| MPP1          | cg22858728 |
| PHF16         | cg17843048 |
| MSN           | cg16204757 |
| GPC4          | cg14600040 |
| SYTL4         | cg12382941 |
| KIF4A         | cg17206029 |
| DNASE1L1      | cg09202373 |
| PDCD8         | cg25317260 |
| CXorf41       | cg06350796 |
| BHLHB9        | cg15309236 |
| MGC39606      | cg09347151 |
| UPF3B         | cg15681351 |
| BIRC4         | cg09950034 |
| STK23         | cg24496423 |
| MED12         | cg05511752 |
| TSC22D3       | cg07473550 |
| SLC16A2       | cg06277838 |

|           |       |                       |
|-----------|-------|-----------------------|
| 53128332  | TRUE  | X:53127216-53129170   |
| 134895459 | TRUE  | X:134895007-134896000 |
| 23595650  | TRUE  | X:23595198-23596007   |
| 46656828  | TRUE  | X:46656361-46658460   |
| 153279607 | TRUE  | X:153277879-153281110 |
| 68752833  | TRUE  | X:68752319-68753914   |
| 118254384 | TRUE  | X:118253585-118255522 |
| 129073190 | TRUE  | X:129071186-129073330 |
| 48844907  | TRUE  | X:48844077-48845653   |
| 54087466  | TRUE  | X:54086783-54088233   |
| 134384171 | TRUE  | X:134383127-134384321 |
| 54483777  | TRUE  | X:54483309-54483784   |
| 118889941 | TRUE  | X:118888580-118890917 |
| 132947244 | TRUE  | X:132946499-132947763 |
| 46503912  | TRUE  | X:46502730-46504082   |
| 109133028 | TRUE  | X:109131973-109133498 |
| 47395451  | TRUE  | X:47394182-47395634   |
| 128943139 | TRUE  | X:128941358-128946562 |
| 53003738  | TRUE  | X:53003573-53004951   |
| 102452607 | TRUE  | X:102451844-102452762 |
| 67570323  | TRUE  | X:67569334-67570801   |
| 53477938  | TRUE  | X:53477634-53478316   |
| 9942520   | TRUE  | X:9942388-9944707     |
| 48700069  | TRUE  | X:48699066-48701313   |
| 24621554  | TRUE  | X:24621426-24622402   |
| 135407646 | TRUE  | X:135406317-135407906 |
| 119268820 | TRUE  | X:119268363-119269844 |
| 48341494  | TRUE  | X:48339681-48341694   |
| 118890865 | TRUE  | X:118888580-118890917 |
| 105932481 | TRUE  | X:105932462-105933253 |
| 135790803 | TRUE  | X:135789863-135790845 |
| 48818897  | TRUE  | X:48817890-48819021   |
| 12902888  | TRUE  | X:12902523-12904636   |
| 75309209  | TRUE  | X:75309058-75309844   |
| 100240009 | TRUE  | X:100239491-100240120 |
| 153687343 | TRUE  | X:153686380-153687406 |
| 46656524  | TRUE  | X:46656361-46658460   |
| 64804464  | TRUE  | X:64803987-64804606   |
| 132377430 | TRUE  | X:132375857-132378130 |
| 99873203  | TRUE  | X:99872942-99873874   |
| 69426419  | TRUE  | X:69426172-69427271   |
| 153293868 | TRUE  | X:153292621-153293883 |
| 129127771 | TRUE  | X:129126775-129128085 |
| 106336523 | TRUE  | X:106335539-106336710 |
| 101862253 | TRUE  | X:101862184-101862707 |
| 134383206 | TRUE  | X:134383127-134384321 |
| 118871191 | TRUE  | X:118870555-118871381 |
| 122821750 | TRUE  | X:122821066-122822021 |
| 152699674 | TRUE  | X:152699478-152699970 |
| 70255381  | TRUE  | X:70254864-70255742   |
| 106905847 | TRUE  | X:106905712-106906660 |
| 73558095  | FALSE |                       |

| beta case avg | beta control avg | pvalue      | delta        | Methyl Status    |
|---------------|------------------|-------------|--------------|------------------|
| 0.462797538   | 0.260650317      | 0.002164502 | 0.202147221  | hypermethylation |
| 0.68506169    | 0.479273022      | 0.015151515 | 0.205788668  | hypermethylation |
| 0.564209671   | 0.305028012      | 0.041125541 | 0.259181659  | hypermethylation |
| 0.53105589    | 0.172197506      | 0.041125541 | 0.358858384  | hypermethylation |
| 0.699679624   | 0.497785226      | 0.008658009 | 0.201894398  | hypermethylation |
| 0.507442771   | 0.224199703      | 0.004329004 | 0.283243068  | hypermethylation |
| 0.435564336   | 0.192886545      | 0.015151515 | 0.242677791  | hypermethylation |
| 0.395627982   | 0.144553221      | 0.025974026 | 0.251074761  | hypermethylation |
| 0.55622763    | 0.251478328      | 0.041125541 | 0.304749302  | hypermethylation |
| 0.79298173    | 0.581241444      | 0.041125541 | 0.211740286  | hypermethylation |
| 0.556142609   | 0.333223641      | 0.015151515 | 0.222918968  | hypermethylation |
| 0.547032932   | 0.316040175      | 0.015151515 | 0.230992757  | hypermethylation |
| 0.350698226   | 0.142667632      | 0.002164502 | 0.208030594  | hypermethylation |
| 0.444916887   | 0.219262716      | 0.015151515 | 0.225654171  | hypermethylation |
| 0.500983824   | 0.25514035       | 0.008658009 | 0.245843474  | hypermethylation |
| 0.494460653   | 0.235770782      | 0.025974026 | 0.258689871  | hypermethylation |
| 0.466027644   | 0.205626076      | 0.008658009 | 0.260401568  | hypermethylation |
| 0.622133084   | 0.33299321       | 0.025974026 | 0.289139874  | hypermethylation |
| 0.707768086   | 0.418393208      | 0.015151515 | 0.289374878  | hypermethylation |
| 0.609457492   | 0.39969596       | 0.025974026 | 0.209761532  | hypermethylation |
| 0.681369545   | 0.426758935      | 0.041125541 | 0.25461061   | hypermethylation |
| 0.609054932   | 0.353599607      | 0.015151515 | 0.255455325  | hypermethylation |
| 0.60417398    | 0.333918079      | 0.008658009 | 0.270255901  | hypermethylation |
| 0.590469951   | 0.340885494      | 0.015151515 | 0.249584457  | hypermethylation |
| 0.525736231   | 0.324347643      | 0.041125541 | 0.201388588  | hypermethylation |
| 0.486353798   | 0.283322214      | 0.041125541 | 0.203031584  | hypermethylation |
| 0.584754179   | 0.364560446      | 0.041125541 | 0.220193733  | hypermethylation |
| 0.482261174   | 0.261554377      | 0.041125541 | 0.220706797  | hypermethylation |
| 0.560173454   | 0.326838199      | 0.041125541 | 0.233335255  | hypermethylation |
| 0.473486133   | 0.232480245      | 0.041125541 | 0.241005888  | hypermethylation |
| 0.660729257   | 0.415836929      | 0.041125541 | 0.244892328  | hypermethylation |
| 0.454442721   | 0.207316709      | 0.041125541 | 0.247126012  | hypermethylation |
| 0.546815555   | 0.297104121      | 0.025974026 | 0.249711434  | hypermethylation |
| 0.526145443   | 0.319808709      | 0.025974026 | 0.206336734  | hypermethylation |
| 0.462219356   | 0.229531318      | 0.015151515 | 0.232688038  | hypermethylation |
| 0.372530751   | 0.133115948      | 0.025974026 | 0.239414803  | hypermethylation |
| 0.557193681   | 0.335321939      | 0.015151515 | 0.221871742  | hypermethylation |
| 0.646020156   | 0.292228927      | 0.015151515 | 0.353791229  | hypermethylation |
| 0.480014426   | 0.270977888      | 0.015151515 | 0.209036538  | hypermethylation |
| 0.503657874   | 0.261230658      | 0.002164502 | 0.242427216  | hypermethylation |
| 0.623721737   | 0.36153968       | 0.041125541 | 0.262182057  | hypermethylation |
| 0.469443599   | 0.205120852      | 0.025974026 | 0.264322747  | hypermethylation |
| 0.573884038   | 0.276184478      | 0.025974026 | 0.29769956   | hypermethylation |
| 0.637935002   | 0.354346004      | 0.041125541 | 0.283588998  | hypermethylation |
| 0.48791394    | 0.282605661      | 0.041125541 | 0.205308279  | hypermethylation |
| 0.534912035   | 0.281843287      | 0.015151515 | 0.253068748  | hypermethylation |
| 0.64051804    | 0.391745434      | 0.025974026 | 0.248772606  | hypermethylation |
| 0.623878547   | 0.321025117      | 0.015151515 | 0.30285343   | hypermethylation |
| 0.546991501   | 0.756440014      | 0.015151515 | -0.209448513 | hypomethylation  |
| 0.542835105   | 0.749444327      | 0.025974026 | -0.206609222 | hypomethylation  |
| 0.473469316   | 0.673529817      | 0.002164502 | -0.200060501 | hypomethylation  |
| 0.522524967   | 0.729632532      | 0.002164502 | -0.207107565 | hypomethylation  |
| 0.415598144   | 0.619103901      | 0.015151515 | -0.203505757 | hypomethylation  |
| 0.556855828   | 0.815639421      | 0.002164502 | -0.258783593 | hypomethylation  |
| 0.553756671   | 0.793247083      | 0.002164502 | -0.239490412 | hypomethylation  |
| 0.206515192   | 0.454316727      | 0.002164502 | -0.247801535 | hypomethylation  |
| 0.538916934   | 0.757875733      | 0.041125541 | -0.218958799 | hypomethylation  |
| 0.158479209   | 0.57095172       | 0.041125541 | -0.412472511 | hypomethylation  |

|             |             |             |              |                 |
|-------------|-------------|-------------|--------------|-----------------|
| 0.183104399 | 0.576574543 | 0.025974026 | -0.393470144 | hypomethylation |
| 0.17353961  | 0.543612768 | 0.025974026 | -0.370073158 | hypomethylation |
| 0.116534963 | 0.481134568 | 0.041125541 | -0.364599605 | hypomethylation |
| 0.167364166 | 0.51823232  | 0.015151515 | -0.350868154 | hypomethylation |
| 0.158605871 | 0.509041923 | 0.025974026 | -0.350436052 | hypomethylation |
| 0.125485865 | 0.475613416 | 0.041125541 | -0.350127551 | hypomethylation |
| 0.194969411 | 0.541742985 | 0.008658009 | -0.346773574 | hypomethylation |
| 0.540271279 | 0.86538776  | 0.002164502 | -0.325116481 | hypomethylation |
| 0.187979462 | 0.513058761 | 0.041125541 | -0.325079299 | hypomethylation |
| 0.187687835 | 0.503432589 | 0.015151515 | -0.315744754 | hypomethylation |
| 0.24933314  | 0.556801448 | 0.008658009 | -0.307468308 | hypomethylation |
| 0.197958868 | 0.49486886  | 0.041125541 | -0.296909992 | hypomethylation |
| 0.150654673 | 0.441061229 | 0.004329004 | -0.290406556 | hypomethylation |
| 0.184401425 | 0.466254644 | 0.015151515 | -0.281853219 | hypomethylation |
| 0.201153582 | 0.482775362 | 0.041125541 | -0.28162178  | hypomethylation |
| 0.186820074 | 0.467819076 | 0.041125541 | -0.280999002 | hypomethylation |
| 0.210040023 | 0.487001263 | 0.015151515 | -0.27696124  | hypomethylation |
| 0.185885119 | 0.461386924 | 0.025974026 | -0.275501805 | hypomethylation |
| 0.287382104 | 0.562057254 | 0.004329004 | -0.27467515  | hypomethylation |
| 0.123617528 | 0.396854103 | 0.025974026 | -0.273236575 | hypomethylation |
| 0.130973441 | 0.404075547 | 0.025974026 | -0.273102106 | hypomethylation |
| 0.180955461 | 0.449671376 | 0.041125541 | -0.268715915 | hypomethylation |
| 0.14271773  | 0.409064494 | 0.041125541 | -0.266346764 | hypomethylation |
| 0.192345644 | 0.458550941 | 0.041125541 | -0.266205297 | hypomethylation |
| 0.150751066 | 0.405326319 | 0.041125541 | -0.254575253 | hypomethylation |
| 0.109518775 | 0.363642859 | 0.015151515 | -0.254124084 | hypomethylation |
| 0.176361848 | 0.428920353 | 0.041125541 | -0.252558505 | hypomethylation |
| 0.362377339 | 0.607350159 | 0.025974026 | -0.24497282  | hypomethylation |
| 0.438970277 | 0.683674613 | 0.004329004 | -0.244704336 | hypomethylation |
| 0.199344632 | 0.436685026 | 0.004329004 | -0.237340394 | hypomethylation |
| 0.26302819  | 0.497922832 | 0.015151515 | -0.234894642 | hypomethylation |
| 0.225332639 | 0.45918263  | 0.015151515 | -0.233849991 | hypomethylation |
| 0.257073234 | 0.489770881 | 0.041125541 | -0.232697647 | hypomethylation |
| 0.172372737 | 0.404734092 | 0.025974026 | -0.232361355 | hypomethylation |
| 0.301888296 | 0.533171313 | 0.025974026 | -0.231283017 | hypomethylation |
| 0.166637553 | 0.397180441 | 0.025974026 | -0.230542888 | hypomethylation |
| 0.223065921 | 0.45027951  | 0.041125541 | -0.227213589 | hypomethylation |
| 0.146693337 | 0.372446746 | 0.041125541 | -0.225753409 | hypomethylation |
| 0.170840896 | 0.395430298 | 0.025974026 | -0.224589402 | hypomethylation |
| 0.160726484 | 0.384837009 | 0.008658009 | -0.224110525 | hypomethylation |
| 0.288697452 | 0.512373637 | 0.025974026 | -0.223676185 | hypomethylation |
| 0.182685114 | 0.405135098 | 0.015151515 | -0.222449984 | hypomethylation |
| 0.27609342  | 0.497968916 | 0.041125541 | -0.221875496 | hypomethylation |
| 0.196727416 | 0.41223549  | 0.008658009 | -0.215508074 | hypomethylation |
| 0.246615147 | 0.461855814 | 0.015151515 | -0.215240667 | hypomethylation |
| 0.257290357 | 0.471485836 | 0.025974026 | -0.214195479 | hypomethylation |
| 0.199012673 | 0.413038784 | 0.025974026 | -0.214026111 | hypomethylation |
| 0.182171175 | 0.389476558 | 0.041125541 | -0.207305383 | hypomethylation |
| 0.355195213 | 0.559772149 | 0.041125541 | -0.204576936 | hypomethylation |
| 0.204176138 | 0.408441852 | 0.025974026 | -0.204265714 | hypomethylation |
| 0.121894853 | 0.323211414 | 0.015151515 | -0.201316561 | hypomethylation |
| 0.264622269 | 0.47305734  | 0.025974026 | -0.208435071 | hypomethylation |



| SYMBOL    | NAME       | CHR | MAPINFO   | CPG_ISLAND | CPG_ISLAND_LOCATIONS   |
|-----------|------------|-----|-----------|------------|------------------------|
| ZNF124    | cg21918500 | 1   | 245402094 | TRUE       | 1:245401260-245402151  |
| TTLL7     | cg03098721 | 1   | 84236672  | TRUE       | 1:84236652-84237966    |
| S100A9    | cg16139316 | 1   | 151597382 | FALSE      |                        |
| CNIH3     | cg00290506 | 1   | 222870849 | TRUE       | 1:222870113-222872558  |
| BCAN      | cg21475402 | 1   | 154878764 | TRUE       | 1:154878094-154879230  |
| GNLY      | cg11752275 | 2   | 85774547  | FALSE      |                        |
| EN1       | cg22231902 | 2   | 119321371 | TRUE       | 2:119320039-119321504  |
| SRD5A2    | cg15403517 | 2   | 31659779  | TRUE       | 2:31658633-31660643    |
| HK2       | cg18638581 | 2   | 74913110  | FALSE      |                        |
| CPA3      | cg13424229 | 3   | 150064527 | FALSE      |                        |
| C3orf60   | cg07109801 | 3   | 49032665  | TRUE       | 3:49032563-49032797    |
| TRPC1     | cg24794531 | 3   | 143926527 | TRUE       | 3:143925285-143926748  |
| EIF5A2    | cg26209058 | 3   | 172109215 | TRUE       | 3:172108452-172109716  |
| PEX5L     | cg21176048 | 3   | 181237929 | TRUE       | 3:181236808-181238032  |
| POU4F2    | cg13262687 | 4   | 147779029 | TRUE       | 4:147778503-147781596  |
| CRMP1     | cg03544320 | 4   | 5945592   | TRUE       | 4:5944246-5946191      |
| CART      | cg23300372 | 5   | 71051188  | TRUE       | 5:71050507-71051626    |
| IRF4      | cg12741420 | 6   | 337131    | TRUE       | 6:336092-339080        |
| CFB       | cg17741572 | 6   | 32022284  | FALSE      |                        |
| HIST1H2BI | cg02192855 | 6   | 26381178  | TRUE       | 6:26381046-26381970    |
| HIST1H3D  | cg08307092 | 6   | 26308153  | TRUE       | 6:26307702-26308258    |
| SNX9      | cg26845300 | 6   | 158163821 | TRUE       | 6:158163446-158165173  |
| ZNF96     | cg02622316 | 6   | 28475389  | TRUE       | 6:28474985-28475928    |
| HIST1H4E  | cg16706631 | 6   | 26312802  | TRUE       | 6:26312577-26313287    |
| ACTL6B    | cg08572611 | 7   | 100091850 | TRUE       | 7:100091590-100092362  |
| GATA4     | cg08369065 | 8   | 11600092  | TRUE       | 8:11598711-11600557    |
| ADRB3     | cg17619823 | 8   | 37942632  | TRUE       | 8:37941431-37943204    |
| GATA4     | cg00090147 | 8   | 11599776  | TRUE       | 8:11598711-11600557    |
| NEF3      | cg18267374 | 8   | 24827178  | TRUE       | 8:24826692-24829288    |
| LHX2      | cg07109287 | 9   | 125813894 | TRUE       | 9:125813052-125815466  |
| INA       | cg25764191 | 10  | 105027205 | TRUE       | 10:105026442-105028852 |
| PRAP1     | cg03743584 | 10  | 135010898 | FALSE      |                        |
| GAD2      | cg04599297 | 10  | 26545448  | TRUE       | 10:26543757-26547625   |
| HTR7      | cg06291867 | 10  | 92607142  | TRUE       | 10:92606622-92608182   |
| C10orf125 | cg12251804 | 10  | 135021073 | TRUE       | 10:135020610-135021994 |
| CYP2E1    | cg13315147 | 10  | 135191518 | TRUE       | 10:135191138-135192648 |
| EGR2      | cg19355190 | 10  | 64245804  | TRUE       | 10:64244521-64245891   |
| FLJ46831  | cg19884262 | 10  | 129425958 | TRUE       | 10:129424072-129426344 |
| INA       | cg23642747 | 10  | 105026635 | TRUE       | 10:105026442-105028852 |
| WT1       | cg16092786 | 11  | 32412311  | TRUE       | 11:32411271-32413831   |
| FURIN     | cg26377677 | 15  | 89213122  | FALSE      |                        |
| FOXB1     | cg22777952 | 15  | 58083717  | TRUE       | 15:58083184-58086207   |
| FOXB1     | cg08583049 | 15  | 58084107  | TRUE       | 15:58083184-58086207   |
| HS3ST2    | cg19064258 | 16  | 22733618  | TRUE       | 16:22732005-22734135   |
| IRF8      | cg24826867 | 16  | 84490354  | TRUE       | 16:84489299-84490591   |
| RND2      | cg05270634 | 17  | 38430971  | TRUE       | 17:38429704-38431262   |
| SLC16A3   | cg14417329 | 17  | 77779562  | TRUE       | 17:77779304-77780821   |
| MGAT5B    | cg00654814 | 17  | 72376663  | TRUE       | 17:72375680-72377919   |
| CA4       | cg04532952 | 17  | 55582527  | TRUE       | 17:55581878-55583315   |

|          |            |    |           |       |                       |
|----------|------------|----|-----------|-------|-----------------------|
| HOXB13   | cg21842478 | 17 | 44161045  | TRUE  | 17:44160495-44161328  |
| GAS7     | cg22471346 | 17 | 10042198  | TRUE  | 17:10041659-10043517  |
| GALR1    | cg04534765 | 18 | 73091357  | TRUE  | 18:73090255-73093032  |
| GNA11    | cg14917512 | 19 | 3045685   | TRUE  | 19:3044235-3046095    |
| F2RL3    | cg19006008 | 19 | 16860768  | FALSE |                       |
| EDN3     | cg04048259 | 20 | 57308741  | TRUE  | 20:57308563-57309693  |
| SDCBP2   | cg16173067 | 20 | 1257722   | FALSE |                       |
| SYNGR1   | cg19713460 | 22 | 38075476  | TRUE  | 22:38075299-38076737  |
| ELF4     | cg04544154 | X  | 129073190 | TRUE  | X:129071186-129073330 |
| HTATSF1  | cg09923855 | X  | 135407132 | TRUE  | X:135406317-135407906 |
| TMEM29   | cg03936963 | X  | 53003738  | TRUE  | X:53003573-53004951   |
| FLJ20298 | cg04238548 | X  | 105932481 | TRUE  | X:105932462-105933253 |
| NDUFA1   | cg14541939 | X  | 118889941 | TRUE  | X:118888580-118890917 |
| DXS9879E | cg20641280 | X  | 153360987 | TRUE  | X:153359988-153361104 |
| RNF113A  | cg23180270 | X  | 118890865 | TRUE  | X:118888580-118890917 |
| EFNB1    | cg04907664 | X  | 67966530  | TRUE  | X:67965268-67967122   |
| CXorf41  | cg06350796 | X  | 106336523 | TRUE  | X:106335539-106336710 |
| PGRMC1   | cg07876586 | X  | 118254384 | TRUE  | X:118253585-118255522 |
| SYTL4    | cg12382941 | X  | 99873203  | TRUE  | X:99872942-99873874   |
| NHS      | cg14345281 | X  | 17303505  | TRUE  | X:17302835-17305853   |
| MGC39606 | cg17231524 | X  | 134384171 | TRUE  | X:134383127-134384321 |
| RPL36A   | cg18507125 | X  | 100532762 | TRUE  | X:100532246-100532948 |
| MTMR1    | cg23947872 | X  | 149613021 | TRUE  | X:149611916-149613219 |
| HMGB3    | cg05935584 | X  | 149902481 | TRUE  | X:149901718-149904046 |
| GPC3     | cg07297906 | X  | 132947244 | TRUE  | X:132946499-132947763 |
| TSC22D3  | cg07473550 | X  | 106905847 | TRUE  | X:106905712-106906660 |
| DNASE1L1 | cg09202373 | X  | 153293868 | TRUE  | X:153292621-153293883 |
| PHF8     | cg09920632 | X  | 54087466  | TRUE  | X:54086783-54088233   |
| OTUD5    | cg09928375 | X  | 48699217  | TRUE  | X:48699066-48701313   |
| PRAF2    | cg14368286 | X  | 48818897  | TRUE  | X:48817890-48819021   |
| RBMX     | cg14642832 | X  | 135790803 | TRUE  | X:135789863-135790845 |
| BHLHB9   | cg15309236 | X  | 101862253 | TRUE  | X:101862184-101862707 |
| LAMP2    | cg18307604 | X  | 119487249 | TRUE  | X:119486553-119487414 |
| PHF16    | cg19194595 | X  | 46656828  | TRUE  | X:46656361-46658460   |
| MAOA     | cg19441691 | X  | 43400293  | TRUE  | X:43400130-43400730   |
| HTATSF1  | cg19949137 | X  | 135407646 | TRUE  | X:135406317-135407906 |
| ELK1     | cg21860846 | X  | 47395451  | TRUE  | X:47394182-47395634   |
| FLJ10178 | cg03057808 | X  | 105741952 | TRUE  | X:105741531-105742091 |
| OPHN1    | cg04702045 | X  | 67570323  | TRUE  | X:67569334-67570801   |
| MED12    | cg05511752 | X  | 70255381  | TRUE  | X:70254864-70255742   |
| ATP6AP2  | cg06731599 | X  | 40325648  | TRUE  | X:40324583-40325764   |
| SLC9A6   | cg08695223 | X  | 134895459 | TRUE  | X:134895007-134896000 |
| MGC39606 | cg09347151 | X  | 134383206 | TRUE  | X:134383127-134384321 |
| ARAF     | cg10455133 | X  | 47305452  | TRUE  | X:47305171-47306159   |
| BEX2     | cg12549513 | X  | 102452607 | TRUE  | X:102451844-102452762 |
| GPC4     | cg14600040 | X  | 132377430 | TRUE  | X:132375857-132378130 |
| FSHPRH1  | cg14743649 | X  | 100240009 | TRUE  | X:100239491-100240120 |
| UPF3B    | cg15681351 | X  | 118871191 | TRUE  | X:118870555-118871381 |
| KIF4A    | cg17206029 | X  | 69426419  | TRUE  | X:69426172-69427271   |
| BCORL1   | cg18535534 | X  | 128943139 | TRUE  | X:128941358-128946562 |

|               |            |   |           |       |                       |
|---------------|------------|---|-----------|-------|-----------------------|
| RPL10         | cg18923230 | X | 153279607 | TRUE  | X:153277879-153281110 |
| GLT28D1       | cg19963797 | X | 110811123 | TRUE  | X:110810870-110811991 |
| OCRL          | cg21365235 | X | 128502446 | TRUE  | X:128501680-128502582 |
| MPP1          | cg22858728 | X | 153687343 | TRUE  | X:153686380-153687406 |
| TSPYL2        | cg24779040 | X | 53128332  | TRUE  | X:53127216-53129170   |
| WDR13         | cg25053301 | X | 48341494  | TRUE  | X:48339681-48341694   |
| CXorf26       | cg25591670 | X | 75309209  | TRUE  | X:75309058-75309844   |
| IDH3G         | cg27271445 | X | 152713344 | TRUE  | X:152712310-152713950 |
| BCAP31        | cg02205962 | X | 152643001 | TRUE  | X:152642005-152643632 |
| ZBTB33        | cg02649608 | X | 119268820 | TRUE  | X:119268363-119269844 |
| HADH2         | cg04241572 | X | 53477938  | TRUE  | X:53477634-53478316   |
| CXorf17       | cg04944936 | X | 54226319  | TRUE  | X:54225446-54226910   |
| PRDX4         | cg07581973 | X | 23595650  | TRUE  | X:23595198-23596007   |
| BIRC4         | cg09950034 | X | 122821750 | TRUE  | X:122821066-122822021 |
| ZDHHC15       | cg11272332 | X | 74659535  | TRUE  | X:74659346-74660218   |
| PHKA1         | cg11806565 | X | 71851420  | TRUE  | X:71851306-71852273   |
| RP13-360B22.2 | cg11839979 | X | 109133028 | TRUE  | X:109131973-109133498 |
| WWC3          | cg12064213 | X | 9942520   | TRUE  | X:9942388-9944707     |
| EBP           | cg13771629 | X | 48264871  | TRUE  | X:48264674-48265781   |
| POLA          | cg14520892 | X | 24621554  | TRUE  | X:24621426-24622402   |
| SLC9A7        | cg14841098 | X | 46503912  | TRUE  | X:46502730-46504082   |
| MAOA          | cg15014034 | X | 43400488  | TRUE  | X:43400130-43400730   |
| EFNB1         | cg15977272 | X | 67965634  | TRUE  | X:67965268-67967122   |
| MSN           | cg16204757 | X | 64804464  | TRUE  | X:64803987-64804606   |
| WDR45         | cg17552650 | X | 48844907  | TRUE  | X:48844077-48845653   |
| PHF16         | cg17843048 | X | 46656524  | TRUE  | X:46656361-46658460   |
| PDK3          | cg18414950 | X | 24393817  | TRUE  | X:24392800-24393964   |
| ATP6AP1       | cg18742441 | X | 153310416 | TRUE  | X:153309132-153310681 |
| OTUD5         | cg18780401 | X | 48700069  | TRUE  | X:48699066-48701313   |
| RP1-112K5.2   | cg20504202 | X | 54483777  | TRUE  | X:54483309-54483784   |
| EDA           | cg20540913 | X | 68752833  | TRUE  | X:68752319-68753914   |
| TMSB4X        | cg21400640 | X | 12902888  | TRUE  | X:12902523-12904636   |
| STK23         | cg24496423 | X | 152699674 | TRUE  | X:152699478-152699970 |
| USP11         | cg25316166 | X | 46977232  | TRUE  | X:46977105-46978329   |
| PDCD8         | cg25317260 | X | 129127771 | TRUE  | X:129126775-129128085 |
| USP51         | cg25424556 | X | 55532208  | TRUE  | X:55531479-55532401   |
| RPGR          | cg25933726 | X | 38071343  | TRUE  | X:38070900-38072122   |
| SLC16A2       | cg06277838 |   | 73558095  | FALSE |                       |

| beta_case_avg | beta_control_avg | pvalue      | delta       | statistic | TSS_COORDINATE |
|---------------|------------------|-------------|-------------|-----------|----------------|
| 0.462797538   | 0.260650317      | 0.002164502 | 0.202147221 | 36        | 245401941      |
| 0.68506169    | 0.479273022      | 0.015151515 | 0.205788667 | 33        | 84237403       |
| 0.546991501   | 0.756440014      | 0.015151515 | 0.209448513 | 3         | 151596954      |
| 0.53105589    | 0.172197506      | 0.041125541 | 0.358858385 | 31        | 222870802      |
| 0.564209671   | 0.305028012      | 0.041125541 | 0.259181658 | 31        | 154878364      |
| 0.473469316   | 0.673529817      | 0.002164502 | 0.200060501 | 0         | 85774925       |
| 0.507442771   | 0.224199703      | 0.004329004 | 0.283243068 | 35        | 119322229      |
| 0.699679624   | 0.497785226      | 0.008658009 | 0.201894398 | 34        | 31659544       |
| 0.542835105   | 0.749444327      | 0.025974026 | 0.206609222 | 4         | 74913290       |
| 0.522524967   | 0.729632532      | 0.002164502 | 0.207107565 | 0         | 150065774      |
| 0.415598144   | 0.619103901      | 0.015151515 | 0.203505757 | 3         | 49032912       |
| 0.435564336   | 0.192886545      | 0.015151515 | 0.24267779  | 33        | 143925956      |
| 0.395627982   | 0.144553221      | 0.025974026 | 0.251074761 | 32        | 172109120      |
| 0.55622763    | 0.251478328      | 0.041125541 | 0.304749302 | 31        | 181237211      |
| 0.556142609   | 0.333223641      | 0.015151515 | 0.222918968 | 33        | 147779538      |
| 0.79298173    | 0.581241444      | 0.041125541 | 0.211740287 | 31        | 5945686        |
| 0.547032932   | 0.316040175      | 0.015151515 | 0.230992758 | 33        | 71050750       |
| 0.350698226   | 0.142667632      | 0.002164502 | 0.208030593 | 36        | 336760         |
| 0.556855828   | 0.815639421      | 0.002164502 | 0.258783593 | 0         | 32021752       |
| 0.500983824   | 0.25514035       | 0.008658009 | 0.245843474 | 34        | 26381183       |
| 0.466027644   | 0.205626076      | 0.008658009 | 0.260401569 | 34        | 26307443       |
| 0.444916887   | 0.219262716      | 0.015151515 | 0.225654171 | 33        | 158164282      |
| 0.494460653   | 0.235770782      | 0.025974026 | 0.258689872 | 32        | 28475487       |
| 0.622133084   | 0.33299321       | 0.025974026 | 0.289139874 | 32        | 26312852       |
| 0.707768086   | 0.418393208      | 0.015151515 | 0.289374878 | 33        | 100091986      |
| 0.60417398    | 0.333918079      | 0.008658009 | 0.270255902 | 34        |                |
| 0.609054932   | 0.353599607      | 0.015151515 | 0.255455324 | 33        | 37943341       |
| 0.609457492   | 0.39969596       | 0.025974026 | 0.209761532 | 32        |                |
| 0.681369545   | 0.426758935      | 0.041125541 | 0.25461061  | 31        | 24827212       |
| 0.590469951   | 0.340885494      | 0.015151515 | 0.249584457 | 33        | 125813710      |
| 0.546815555   | 0.297104121      | 0.025974026 | 0.249711434 | 32        | 105026910      |
| 0.560173454   | 0.326838199      | 0.041125541 | 0.233335255 | 31        | 135010901      |
| 0.584754179   | 0.364560446      | 0.041125541 | 0.220193734 | 31        | 26545600       |
| 0.525736231   | 0.324347643      | 0.041125541 | 0.201388588 | 31        | 92607651       |
| 0.454442721   | 0.207316709      | 0.041125541 | 0.247126012 | 31        | 135021519      |
| 0.660729257   | 0.415836929      | 0.041125541 | 0.244892328 | 31        | 135190857      |
| 0.482261174   | 0.261554377      | 0.041125541 | 0.220706797 | 31        | 64246133       |
| 0.473486133   | 0.232480245      | 0.041125541 | 0.241005887 | 31        | 129425942      |
| 0.486353798   | 0.283322214      | 0.041125541 | 0.203031584 | 31        | 105026910      |
| 0.526145443   | 0.319808709      | 0.025974026 | 0.206336734 | 32        |                |
| 0.553756671   | 0.793247083      | 0.002164502 | 0.239490412 | 0         | 89212889       |
| 0.462219356   | 0.229531318      | 0.015151515 | 0.232688038 | 33        | 58084427       |
| 0.372530751   | 0.133115948      | 0.025974026 | 0.239414803 | 32        | 58084427       |
| 0.557193681   | 0.335321939      | 0.015151515 | 0.221871742 | 33        | 22733361       |
| 0.646020156   | 0.292228927      | 0.015151515 | 0.353791228 | 33        | 84490275       |
| 0.503657874   | 0.261230658      | 0.002164502 | 0.242427216 | 36        | 38430791       |
| 0.206515192   | 0.454316727      | 0.002164502 | 0.247801536 | 0         | 77780236       |
| 0.480014426   | 0.270977888      | 0.015151515 | 0.209036539 | 33        | 72376393       |
| 0.573884038   | 0.276184478      | 0.025974026 | 0.29769956  | 32        | 55582131       |

|             |             |             |             |    |           |
|-------------|-------------|-------------|-------------|----|-----------|
| 0.469443599 | 0.205120852 | 0.025974026 | 0.264322747 | 32 | 44161087  |
| 0.623721737 | 0.36153968  | 0.041125541 | 0.262182057 | 31 | 10042593  |
| 0.637935002 | 0.354346004 | 0.041125541 | 0.283588998 | 31 | 73090721  |
| 0.534912035 | 0.281843287 | 0.015151515 | 0.253068747 | 33 | 3045530   |
| 0.48791394  | 0.282605661 | 0.041125541 | 0.205308279 | 31 | 16860826  |
| 0.64051804  | 0.391745434 | 0.025974026 | 0.248772606 | 32 | 57308894  |
| 0.538916934 | 0.757875733 | 0.041125541 | 0.2189588   | 5  | 1257826   |
| 0.623878547 | 0.321025117 | 0.015151515 | 0.30285343  | 33 | 38075900  |
| 0.540271279 | 0.86538776  | 0.002164502 | 0.325116481 | 0  | 129072153 |
| 0.132677439 | 0.430460164 | 0.002164502 | 0.297782725 | 0  | 135407337 |
| 0.287382104 | 0.562057254 | 0.004329004 | 0.27467515  | 1  | 53002901  |
| 0.199344632 | 0.436685026 | 0.004329004 | 0.237340394 | 1  | 105932575 |
| 0.150654673 | 0.441061229 | 0.004329004 | 0.290406556 | 1  | 118889762 |
| 0.222557718 | 0.570424866 | 0.004329004 | 0.347867148 | 1  | 153360790 |
| 0.438970277 | 0.683674613 | 0.004329004 | 0.244704336 | 1  | 118889818 |
| 0.240309248 | 0.449403027 | 0.008658009 | 0.209093779 | 2  |           |
| 0.196727416 | 0.41223549  | 0.008658009 | 0.215508074 | 2  | 106336518 |
| 0.194969411 | 0.541742985 | 0.008658009 | 0.346773574 | 2  | 118254291 |
| 0.160726484 | 0.384837009 | 0.008658009 | 0.224110525 | 2  | 99873154  |
| 0.190507538 | 0.417878522 | 0.008658009 | 0.227370985 | 2  | 17303464  |
| 0.24933314  | 0.556801448 | 0.008658009 | 0.307468308 | 2  | 134383537 |
| 0.240305228 | 0.517077138 | 0.008658009 | 0.27677191  | 2  | 100532600 |
| 0.199493815 | 0.484043167 | 0.008658009 | 0.284549351 | 2  | 149612503 |
| 0.140457051 | 0.562630795 | 0.015151515 | 0.422173744 | 3  | 149902421 |
| 0.184401425 | 0.466254644 | 0.015151515 | 0.281853219 | 3  | 132947332 |
| 0.121894853 | 0.323211414 | 0.015151515 | 0.201316561 | 3  | 106905673 |
| 0.182685114 | 0.405135098 | 0.015151515 | 0.222449985 | 3  | 153293621 |
| 0.187687835 | 0.503432589 | 0.015151515 | 0.315744754 | 3  | 54087036  |
| 0.223743018 | 0.572961131 | 0.015151515 | 0.349218113 | 3  | 48699837  |
| 0.225332639 | 0.45918263  | 0.015151515 | 0.233849991 | 3  | 48818606  |
| 0.26302819  | 0.497922832 | 0.015151515 | 0.234894641 | 3  | 135790605 |
| 0.246615147 | 0.461855814 | 0.015151515 | 0.215240667 | 3  | 101862310 |
| 0.19202539  | 0.480988292 | 0.015151515 | 0.288962902 | 3  | 119487189 |
| 0.167364166 | 0.51823232  | 0.015151515 | 0.350868154 | 3  | 46656812  |
| 0.135765253 | 0.347080526 | 0.015151515 | 0.211315273 | 3  | 43400353  |
| 0.109518775 | 0.363642859 | 0.015151515 | 0.254124083 | 3  | 135407337 |
| 0.210040023 | 0.487001263 | 0.015151515 | 0.27696124  | 3  | 47394964  |
| 0.171839699 | 0.416557591 | 0.025974026 | 0.244717891 | 4  | 105741909 |
| 0.130973441 | 0.404075547 | 0.025974026 | 0.273102106 | 4  | 67570372  |
| 0.204176138 | 0.408441852 | 0.025974026 | 0.204265714 | 4  | 70255298  |
| 0.221223002 | 0.459914924 | 0.025974026 | 0.238691922 | 4  | 40325160  |
| 0.17353961  | 0.543612768 | 0.025974026 | 0.370073158 | 4  | 134895293 |
| 0.257290357 | 0.471485836 | 0.025974026 | 0.214195479 | 4  | 134383537 |
| 0.162907613 | 0.363957685 | 0.025974026 | 0.201050072 | 4  | 47305451  |
| 0.123617528 | 0.396854103 | 0.025974026 | 0.273236575 | 4  | 102452601 |
| 0.170840896 | 0.395430298 | 0.025974026 | 0.224589402 | 4  | 132376871 |
| 0.301888296 | 0.533171313 | 0.025974026 | 0.231283017 | 4  | 100241454 |
| 0.199012673 | 0.413038784 | 0.025974026 | 0.214026111 | 4  | 118870996 |
| 0.288697452 | 0.512373637 | 0.025974026 | 0.223676186 | 4  | 69426687  |
| 0.185885119 | 0.461386924 | 0.025974026 | 0.275501805 | 4  | 128944350 |

|             |             |             |             |   |           |
|-------------|-------------|-------------|-------------|---|-----------|
| 0.158605871 | 0.509041923 | 0.025974026 | 0.350436052 | 4 | 153279912 |
| 0.125607685 | 0.43811335  | 0.025974026 | 0.312505664 | 4 | 110811069 |
| 0.173199452 | 0.509561186 | 0.025974026 | 0.336361734 | 4 | 128501933 |
| 0.166637553 | 0.397180441 | 0.025974026 | 0.230542888 | 4 | 153686957 |
| 0.183104399 | 0.576574543 | 0.025974026 | 0.393470143 | 4 | 53128287  |
| 0.362377339 | 0.607350159 | 0.025974026 | 0.24497282  | 4 | 48340845  |
| 0.172372737 | 0.404734092 | 0.025974026 | 0.232361355 | 4 | 75309173  |
| 0.156467557 | 0.482216466 | 0.025974026 | 0.325748909 | 4 | 152713161 |
| 0.158479209 | 0.57095172  | 0.041125541 | 0.412472511 | 5 | 152643081 |
| 0.176361848 | 0.428920353 | 0.041125541 | 0.252558505 | 5 | 119268635 |
| 0.180955461 | 0.449671376 | 0.041125541 | 0.268715915 | 5 | 53478045  |
| 0.221818121 | 0.443347135 | 0.041125541 | 0.221529014 | 5 | 54226416  |
| 0.116534963 | 0.481134568 | 0.041125541 | 0.364599605 | 5 | 23595566  |
| 0.182171175 | 0.389476558 | 0.041125541 | 0.207305383 | 5 | 122821729 |
| 0.23128271  | 0.437074452 | 0.041125541 | 0.205791742 | 5 | 74659600  |
| 0.214773706 | 0.419864521 | 0.041125541 | 0.205090815 | 5 | 71850612  |
| 0.186820074 | 0.467819076 | 0.041125541 | 0.280999002 | 5 | 109132999 |
| 0.14271773  | 0.409064494 | 0.041125541 | 0.266346765 | 5 | 9943612   |
| 0.156641317 | 0.426360257 | 0.041125541 | 0.26971894  | 5 | 48265201  |
| 0.150751066 | 0.405326319 | 0.041125541 | 0.254575252 | 5 | 24621985  |
| 0.201153582 | 0.482775362 | 0.041125541 | 0.28162178  | 5 | 46503416  |
| 0.21638598  | 0.481187199 | 0.041125541 | 0.264801218 | 5 | 43400353  |
| 0.198954529 | 0.563032782 | 0.041125541 | 0.364078253 | 5 | 67965556  |
| 0.146693337 | 0.372446746 | 0.041125541 | 0.225753409 | 5 | 64804236  |
| 0.187979462 | 0.513058761 | 0.041125541 | 0.325079299 | 5 | 48845003  |
| 0.223065921 | 0.45027951  | 0.041125541 | 0.227213589 | 5 | 46656812  |
| 0.194760459 | 0.5329129   | 0.041125541 | 0.338152441 | 5 | 24393475  |
| 0.235342203 | 0.55019282  | 0.041125541 | 0.314850617 | 5 | 153310215 |
| 0.192345644 | 0.458550941 | 0.041125541 | 0.266205297 | 5 | 48699837  |
| 0.197958868 | 0.49486886  | 0.041125541 | 0.296909992 | 5 | 54483578  |
| 0.125485865 | 0.475613416 | 0.041125541 | 0.350127551 | 5 | 68752636  |
| 0.257073234 | 0.489770881 | 0.041125541 | 0.232697647 | 5 | 12903148  |
| 0.355195213 | 0.559772149 | 0.041125541 | 0.204576936 | 5 | 152699704 |
| 0.185578902 | 0.386217868 | 0.041125541 | 0.200638967 | 5 | 46977258  |
| 0.27609342  | 0.497968916 | 0.041125541 | 0.221875497 | 5 | 129127489 |
| 0.116796247 | 0.368880164 | 0.041125541 | 0.252083917 | 5 | 55532356  |
| 0.190859372 | 0.503709647 | 0.041125541 | 0.312850275 | 5 | 38071732  |
| 0.264622269 | 0.47305734  | 0.025974026 | 0.208435072 | 4 | 73557810  |

| GENE_STRAND | GENE_ID       | SYNONYM                                                     |
|-------------|---------------|-------------------------------------------------------------|
| -           | GeneID:7678   | HZF16; MGC117046;                                           |
| -           | GeneID:79739  | FLJ23033; FLJ36855; RP5-836J3.2;                            |
| +           | GeneID:6280   | MIF; NIF; P14; CAGB; CFAG; CGLB; L1AG; LIAG; MRP14; 60B8AG; |
| +           | GeneID:149111 | FLJ38993;                                                   |
| +           | GeneID:63827  | BEHAB; CSPG7; MGC13038;                                     |
| +           | GeneID:10578  | 519; LAG2; NKG5; LAG-2; D2S69E; TLA519; lymphokine;         |
| -           | GeneID:2019   |                                                             |
| -           | GeneID:6716   |                                                             |
| +           | GeneID:3099   | HKII; HXK2; DKFZp686M1669;                                  |
| +           | GeneID:1359   |                                                             |
| +           | GeneID:25915  | 2P1; E3-3; MGC10527; DKFZP564J0123;                         |
| +           | GeneID:7220   | TRP1; HTRP-1;                                               |
| -           | GeneID:56648  | EIF-5A2; eIF5AII;                                           |
| -           | GeneID:51555  | PXR2; PEX5R; PXR2B;                                         |
| +           | GeneID:5458   | BRN3B; BRN3.2; Brn-3b;                                      |
| -           | GeneID:1400   | DRP1; DRP-1; DPYSL1;                                        |
| +           | GeneID:9607   |                                                             |
| +           | GeneID:3662   | MUM1; LSIRF;                                                |
| +           | GeneID:629    | BF; BFD; GBG; CFAB; PBF2; H2-Bf;                            |
| +           | GeneID:8346   | H2B/k; H2BfK;                                               |
| -           | GeneID:8351   | H3/b; H3fB;                                                 |
| +           | GeneID:51429  | SDP1; WISP; MST155; SH3PX1; MSTP155; SH3PXD3A;              |
| -           | GeneID:9753   | ZFP96; ZNF305; ZNF29K1; ZSCAN12; KIAA0426; dJ29K1.2;        |
| +           | GeneID:8367   | H4/j; H4fJ;                                                 |
| -           | GeneID:51412  | ACTL6; BAF53B;                                              |
| +           | GeneID:2626   | MGC126629;                                                  |
| -           | GeneID:155    | BETA3AR;                                                    |
| +           | GeneID:2626   | MGC126629;                                                  |
| +           | GeneID:4741   | NFM; NEFM; NF-M;                                            |
| +           | GeneID:9355   | LH2; hLhx2;                                                 |
| +           | GeneID:9118   | NEF5; NF-66; TXBP-1; MGC12702;                              |
| +           | GeneID:118471 | UPA; PRO1195; MGC126792; RP11-122K13.6;                     |
| +           | GeneID:2572   | GAD65;                                                      |
| -           | GeneID:3363   | 5-HT7;                                                      |
| -           | GeneID:282969 | FLJ26016;                                                   |
| +           | GeneID:1571   | CPE1; CYP2E; P450-J; P450C2E;                               |
| -           | GeneID:1959   | CMT1D; CMT4E; KROX20; FLJ14547; DKFZp686J1957;              |
| +           | GeneID:399823 | FOXI2;                                                      |
| +           | GeneID:9118   | NEF5; NF-66; TXBP-1; MGC12702;                              |
| -           | GeneID:7490   | GUD; WAGR; WT33; WIT-2;                                     |
| +           | GeneID:5045   | FUR; PACE; SPC1; PCSK3;                                     |
| +           | GeneID:27023  | FKH5; HFKH-5;                                               |
| +           | GeneID:27023  | FKH5; HFKH-5;                                               |
| +           | GeneID:9956   | 3OST2; 3OST2;                                               |
| +           | GeneID:3394   | ICSBP; IRF-8; ICSBP1; H-ICSBP;                              |
| +           | GeneID:8153   | ARHN; RHO7; RhoN;                                           |
| +           | GeneID:9123   | MCT3; MCT4;                                                 |
| +           | GeneID:146664 | GnT-IX; GnT-VB; FLJ25132; KIAA2008;                         |
| +           | GeneID:762    | CAIV; RP17;                                                 |

|   |               |                                                         |
|---|---------------|---------------------------------------------------------|
| - | GeneID:10481  |                                                         |
| - | GeneID:8522   | MGC1348; KIAA0394;                                      |
| + | GeneID:2587   | GALNR; GALNR1;                                          |
| + | GeneID:2767   | GNA-11;                                                 |
| + | GeneID:9002   | PAR4;                                                   |
| + | GeneID:1908   | ET3; MGC15067; MGC61498;                                |
| - | GeneID:27111  | ST-2; SITAC18;                                          |
| + | GeneID:9145   | MGC:1939;                                               |
| - | GeneID:2000   | MEF; ELFR;                                              |
| + | GeneID:27336  | TAT-SF1; dJ196E23.2;                                    |
| - | GeneID:29057  | PRO0659; DKFZp686B22211;                                |
| + | GeneID:54885  |                                                         |
| + | GeneID:4694   | MWFE; ZNF183; CI-MWFE;                                  |
| - | GeneID:8270   | CVG5; ESO3; ITBA2; DXS9951E;                            |
| - | GeneID:7737   | RNF113; ZNF183;                                         |
| + | GeneID:1947   | CFND; CFNS; EFL3; EPLG2; Elk-L; LERK2; MGC8782;         |
| + | GeneID:139212 | MGC35261;                                               |
| + | GeneID:10857  | MPR; HPR6.6;                                            |
| - | GeneID:94121  | exophilin-2; DKFZp451P0116;                             |
| + | GeneID:4810   | SCML1; DKFZp781F2016;                                   |
| + | GeneID:399668 |                                                         |
| + | GeneID:6173   | L44L; MIG6; RPL44; MGC72020;                            |
| + | GeneID:8776   |                                                         |
| + | GeneID:3149   | HMG4; HMG2A; MGC90319;                                  |
| - | GeneID:2719   | SGB; DGSX; SDYS; SGBS; SGBS1;                           |
| - | GeneID:1831   | DIP; GILZ; hDIP; DSIPI; TSC-22R; DKFZp313A1123;         |
| - | GeneID:1774   | XIB; DNL1L; DNAS1L1;                                    |
| - | GeneID:23133  | ZNF422; KIAA1111; DKFZp686E0868;                        |
| - | GeneID:55593  | MGC104871; DKFZp761A052;                                |
| - | GeneID:11230  | JM4;                                                    |
| - | GeneID:27316  | RNMX; HNRPG; RBMXP1; RBMXRT;                            |
| + | GeneID:80823  | p60TRP; KIAA1701;                                       |
| - | GeneID:3920   | LAMPB; CD107b;                                          |
| + | GeneID:9767   | JADE3; KIAA0215;                                        |
| + | GeneID:4128   |                                                         |
| + | GeneID:27336  | TAT-SF1; dJ196E23.2;                                    |
| - | GeneID:2002   |                                                         |
| + | GeneID:55086  | FLJ14191;                                               |
| - | GeneID:4983   | OPN1;                                                   |
| + | GeneID:9968   | HOPA; OPA1; CAGH45; TNRC11; TRAP230; KIAA0192;          |
| + | GeneID:10159  | M8-9; MRXE; XMRE; ATP6IP2; MSTP009; APT6M8-9; ATP6M8-9; |
| + | GeneID:10479  | NHE6; KIAA0267;                                         |
| + | GeneID:399668 |                                                         |
| + | GeneID:369    | PKS2; A-RAF; ARAF1; RAFA1;                              |
| - | GeneID:84707  | BEX1; DJ79P11.1;                                        |
| - | GeneID:2239   | K-glypican;                                             |
| + | GeneID:2491   | CENPI; LRPR1;                                           |
| - | GeneID:65109  | UPF3X; HUPF3B; RENT3B;                                  |
| + | GeneID:24137  | KIF4; KIF4-G1; HSA271784;                               |
| + | GeneID:63035  | FLJ11362; B930011H20Rik;                                |



|   |               |                                                              |
|---|---------------|--------------------------------------------------------------|
| + | GeneID:6134   | QM; NOV; DXS648; DXS648E; FLJ23544;                          |
| + | GeneID:55849  | ALG13; MDS031;                                               |
| + | GeneID:4952   | LOCR; NPHL2; OCRL1; INPP5F;                                  |
| - | GeneID:4354   | MRG1; PEMP; AAG12; EMP55; DXS552; DXS552E;                   |
| + | GeneID:64061  | CDA1; CTCL; CINAP; DENTT; SE20-4; HRIHFB2216;                |
| + | GeneID:64743  | MG21; FLJ20563;                                              |
| + | GeneID:51260  | MGC874;                                                      |
| - | GeneID:3421   | H-IDHG;                                                      |
| - | GeneID:10134  | CDM; BAP31; 6C6-AG; DXS1357E;                                |
| + | GeneID:10009  | ZNF348; ZNF-kaiso;                                           |
| - | GeneID:3028   | ABAD; ERAB; MHBD; HSD17B10; 17b-HSD10;                       |
| - | GeneID:54954  | ORF34; FLJ20506;                                             |
| + | GeneID:10549  | AOE37-2;                                                     |
| + | GeneID:331    | API3; ILP1; MIHA; XIAP;                                      |
| - | GeneID:158866 | MRX91; FLJ31812; MGC119974; MGC119975; MGC119976;            |
| - | GeneID:5255   | PHKA;                                                        |
| + | GeneID:84187  | FLJ20173; bB360B22.3;                                        |
| + | GeneID:55841  | BM042; KIAA1280;                                             |
| + | GeneID:10682  | CPX; CHO2; CPXD; CDPX2;                                      |
| + | GeneID:5422   |                                                              |
| - | GeneID:84679  | NHE7; SLC9A6;                                                |
| + | GeneID:4128   |                                                              |
| + | GeneID:1947   | CFND; CFNS; EFL3; EPLG2; Elk-L; LERK2; MGC8782;              |
| + | GeneID:4478   |                                                              |
| - | GeneID:11152  | JM5; WDRX1; WIPI4; WIPI-4;                                   |
| + | GeneID:9767   | JADE3; KIAA0215;                                             |
| + | GeneID:5165   |                                                              |
| + | GeneID:537    | 16A; CF2; ORF; Ac45; XAP3; XAP-3; ATP6S1; VATPS1; ATP6IP1; M |
| - | GeneID:55593  | MGC104871; DKFZp761A052;                                     |
| + | GeneID:90121  | MGC20451;                                                    |
| + | GeneID:1896   | ED1; HED; EDA1; EDA2; XHED; XLHED; ED1-A1; ED1-A2;           |
| + | GeneID:7114   | FX; TB4X; PTMB4; TMSB4;                                      |
| + | GeneID:26576  | MSSK1; SRPK3; MGC102944;                                     |
| + | GeneID:8237   | UHX1;                                                        |
| - | GeneID:9131   | AIF; MGC111425;                                              |
| - | GeneID:158880 |                                                              |
| - | GeneID:6103   | CRD; RP3; COD1; PCDX; RP15; XLRP3; orf15; CORDX1;            |
| + | GeneID:6567   | AHDS; MCT8; XPCT; DXS128; DXS128E;                           |

| ACCESSION    | GID         | ANNOTATION                                   |
|--------------|-------------|----------------------------------------------|
| NM_003431.2  | GI:42733607 | go_component: nucleus; go_function: DN       |
| NM_024686.3  | GI:40255233 | novel protein containing a tubulin-tyrosin   |
| NM_002965.2  | GI:9845520  | S100 calcium-binding protein A9 (calgranu    |
| NM_152495.1  | GI:22749038 | go_component: membrane; go_compone           |
| NM_198427.1  | GI:38372930 | isoform 2 is encoded by transcript variant   |
| NM_006433.2  | GI:7108343  | isoform NKG5 is encoded by transcript vai    |
| NM_001426.2  | GI:7710118  | go_component: nucleus; go_component:         |
| NM_000348.2  | GI:39812446 | steroid 5-alpha-reductase 2; go_compone      |
| NM_000189.4  | GI:40806188 | hexokinase-2; muscle; go_component: m        |
| NM_001870.1  | GI:4503000  | go_component: secretory granule; go_fur      |
| NM_199069.1  | GI:41327780 | isoform a is encoded by transcript variant   |
| NM_003304.3  | GI:27545448 | transient receptor potential channel 1; go   |
| NM_020390.5  | GI:33187364 | go_function: nucleic acid binding; go_func   |
| NM_016559.1  | GI:7706670  | Pex5p-related protein; go_component: m       |
| NM_004575.1  | GI:4758947  | Brn3b POU domain transcription factor; g     |
| NM_001313.3  | GI:62422567 | isoform 2 is encoded by transcript variant   |
| NM_004291.2  | GI:46852394 | go_component: extracellular space; go_pi     |
| NM_002460.1  | GI:4505286  | multiple myeloma oncogene 1; go_compc        |
| NM_001710.4  | GI:67782357 | C3 proactivator; C3 proaccelerator; glycin   |
| NM_003525.2  | GI:21166387 | synonyms: H2B/k; H2BfK                       |
| NM_003530.3  | GI:39812261 | go_component: nucleus; go_component:         |
| NM_016224.3  | GI:23111056 | SH3 and PX domain-containing protein SH      |
| NM_014724.2  | GI:44917602 | zinc finger protein 305; go_component: n     |
| NM_003545.3  | GI:21264600 | synonyms: H4/j; H4fJ                         |
| NM_016188.3  | GI:21536352 | hArapN alpha; actin-like 6; actin-related pr |
| NT_077531.3  |             | GATA-binding protein 4; go_component: r      |
| NM_000025.1  | GI:4557266  | Beta-3 Adrenergic Receptor; go_compone       |
| NT_077531.3  |             | GATA-binding protein 4; go_component: r      |
| NM_005382.1  | GI:4885512  | neurofilament 3 (150kD medium); neurofi      |
| NM_004789.3  | GI:30795195 | LIM HOX gene 2; go_component: nucleus;       |
| NM_032727.2  | GI:39725658 | neurofilament-66; tax-binding protein; ne    |
| NM_145202.3  | GI:48976058 | uterine-specific proline-rich acidic protein |
| NM_000818.1  | GI:4503874  | Glutamate decarboxylase-2 (pancreas); gl     |
| NM_019859.2  | GI:30795198 | isoform d is encoded by transcript variant   |
| NM_198472.1  | GI:38348261 | go_process: carbohydrate transport           |
| NM_000773.3  | GI:75709190 | microsomal monooxygenase; xenobiotic r       |
| NM_000399.2  | GI:9845523  | Krox-20 homolog; KROX-20; Drosophila; h      |
| NM_207426.1  | GI:46409477 | synonym: FOXI2                               |
| NM_032727.2  | GI:39725658 | neurofilament-66; tax-binding protein; ne    |
| NT_009237.17 |             | isoform C is encoded by transcript variant   |
| NM_002569.2  | GI:20336193 | proprotein convertase subtilisin/kexin typ   |
| NM_012182.1  | GI:11386194 | go_component: nucleus; go_function: tra      |
| NM_012182.1  | GI:11386194 | go_component: nucleus; go_function: tra      |
| NM_006043.1  | GI:5174462  | heparin-glucosamine 3-O-sulfotransferase     |
| NM_002163.2  | GI:55953136 | interferon consensus sequence binding pr     |
| NM_005440.3  | GI:66472870 | GTP-binding protein Rho7; ras homolog g      |
| NM_004207.1  | GI:4759111  | monocarboxylate transporter 3; go_comp       |
| NM_144677.2  | GI:39812180 | isoform 1 is encoded by transcript variant   |
| NM_000717.2  | GI:9951925  | carbonic dehydratase; go_component: m        |

|              |             |                                              |
|--------------|-------------|----------------------------------------------|
| NM_006361.4  | GI:70167332 | homeobox protein HOX-B13; go_component       |
| NM_003644.2  | GI:41406075 | isoform a is encoded by transcript variant   |
| NM_001480.2  | GI:6031165  | go_component: plasma membrane; go_cc         |
| NM_002067.1  | GI:4504036  | guanine nucleotide-binding protein; Gq cl    |
| NM_003950.1  | GI:4503638  | protease-activated receptor-4; go_compo      |
| NM_000114.2  | GI:46370058 | isoform 1 preproprotein is encoded by tra    |
| NM_015685.3  | GI:38016915 | isoform b is encoded by transcript variant   |
| NM_145738.1  | GI:22035699 | isoform 1c is encoded by transcript varian   |
| NM_001421.1  | GI:4503554  | go_component: nucleus; go_component:         |
| NM_014500.3  | GI:34147671 | cofactor required for Tat activation of HIV  |
| NM_014138.3  | GI:50355985 | synonyms: PRO0659; DKFZp686B22211            |
| NM_017752.2  | GI:38570100 | isoform a is encoded by transcript variant   |
| NM_004541.2  | GI:13699820 | ubiquinone oxidoreductase complex I pro      |
| NM_006014.2  | GI:24430136 | go_component: cellular_component unkn        |
| NM_006978.1  | GI:5902157  | zinc finger protein 183 (RING finger; C3HC   |
| NT_011669.16 |             | ligand of eph-related kinase 2; eph-relate   |
| NM_173494.1  | GI:33859792 | synonym: MGC35261                            |
| NM_006667.2  | GI:6857798  | progesterone binding protein; go_compor      |
| NM_080737.1  | GI:18152766 | granuphilin-a; go_component: membrane        |
| NM_198270.2  | GI:40549455 | go_component: nucleus                        |
| NM_203306.1  | GI:42558267 |                                              |
| NM_021029.3  | GI:38683866 | ribosomal protein L44; 60S ribosomal prot    |
| NM_003828.1  | GI:28872760 | isoform 1 is encoded by transcript variant   |
| NM_005342.2  | GI:71143136 | high-mobility group (nonhistone chromos      |
| NM_004484.2  | GI:5360213  | glypican-3 splice variant B; glypican-3 spli |
| NM_004089.3  | GI:62865622 | isoform 2 is encoded by transcript variant   |
| NM_006730.2  | GI:58430940 | DNase I; lysosomal-like; DNase I-like; mus   |
| NM_015107.1  | GI:32698699 | go_function: protein binding; go_function    |
| NM_017602.2  | GI:40353201 | synonyms: MGC104871; DKFZp761A052            |
| NM_007213.1  | GI:6005793  | PRA1 domain family 2; Jena-Muenchen 4;       |
| NM_002139.2  | GI:56699408 | RNA binding motif protein; X chromosome      |
| NM_030639.1  | GI:39930462 | p60-like protein; go_function: binding       |
| NM_002294.1  | GI:4504956  | Lysosome-associated membrane protein-        |
| NM_014735.2  | GI:23110985 | go_function: protein binding; go_function    |
| NM_000240.2  | GI:33469954 | go_component: membrane; go_compone           |
| NM_014500.3  | GI:34147671 | cofactor required for Tat activation of HIV  |
| NM_005229.2  | GI:11496880 | go_component: nucleus; go_function: seq      |
| NM_018015.3  | GI:46195791 | RP11-647M7.1; go_function: DNA binding       |
| NM_002547.1  | GI:4505506  | oligophrenin-1; Rho-GTPase activating pro    |
| NM_005120.1  | GI:4827041  | thyroid hormone receptor-associated pro      |
| NM_005765.2  | GI:15011917 | ATPase; H+ transporting; lysosomal (vacu     |
| NM_006359.1  | GI:5454069  | go_component: microsome; go_compone          |
| NM_203306.1  | GI:42558267 |                                              |
| NM_001654.1  | GI:4502192  | Oncogene ARAF1; v-raf murine sarcoma 3       |
| NM_032621.2  | GI:50658085 | X-linked protein                             |
| NM_001448.2  | GI:21614524 | dJ900E8.1 (glypican 4); go_component: m      |
| NM_006733.2  | GI:41352696 | FSH primary response (LRPR1; rat) homolo     |
| NM_023010.2  | GI:18375526 | isoform 2 is encoded by transcript variant   |
| NM_012310.2  | GI:7305204  | chromokinesin; go_component: nucleus; {      |
| NM_021946.2  | GI:33286441 | synonyms: FLJ11362; B930011H20Rik            |

|             |             |                                              |
|-------------|-------------|----------------------------------------------|
| NM_006013.2 | GI:15718685 | QM gene; 60S ribosomal protein L10; tum      |
| NM_018466.2 | GI:20070304 | asparagine-linked glycosylation 13 homolo    |
| NM_001587.3 | GI:21396492 | oculocerebrorenal syndrome of Lowe pro       |
| NM_002436.2 | GI:6006024  | membrane protein; palmitoylated 1 (55kD      |
| NM_022117.1 | GI:11545834 | cell division autoantigen 1; cutaneous T-c   |
| NM_017883.3 | GI:20544181 | located at OATL1; go_component: nucleu:      |
| NM_016500.3 | GI:32306538 | 2610029G23Rik                                |
| NM_004135.2 | GI:28178836 | isoform a precursor is encoded by transcr    |
| NM_005745.6 | GI:49472837 | accessory protein BAP31; go_component:       |
| NM_006777.3 | GI:41152068 | WUGSC:H_DJ525N14.1; kaiso transcrip          |
| NM_004493.1 | GI:4758503  | isoform 1 is encoded by transcript variant   |
| NM_017848.3 | GI:38348730 | BJ-HCC-21 tumor antigen                      |
| NM_006406.1 | GI:5453548  | thioredoxin peroxidase (antioxidant enzyr    |
| NM_001167.2 | GI:32528298 | X-linked inhibitor of apoptosis; apoptosis i |
| NM_144969.1 | GI:21450652 | go_component: membrane; go_compone           |
| NM_002637.1 | GI:4505778  | Phosphorylase kinase; muscle; alpha poly     |
| NM_032227.1 | GI:14149929 | synonyms: FLJ20173; bB360B22.3               |
| NM_015691.2 | GI:38570148 | synonyms: BM042; KIAA1280                    |
| NM_006579.1 | GI:5729809  | 3-beta-hydroxysteroid-delta-8;delta-7-iso    |
| NM_016937.1 | GI:8393994  | polymerase (DNA-directed); alpha (70kD);     |
| NM_032591.1 | GI:14211918 | nonselective sodium potassium/proton ex      |
| NM_000240.2 | GI:33469954 | go_component: membrane; go_compone           |
| NM_004429.3 | GI:31317225 | ligand of eph-related kinase 2; eph-relate   |
| NM_002444.2 | GI:53729335 | go_component: cytoplasm; go_componer         |
| NM_007075.3 | GI:71483644 | isoform 1 is encoded by transcript variant   |
| NM_014735.2 | GI:23110985 | go_function: protein binding; go_function    |
| NM_005391.1 | GI:4885544  | go_component: mitochondrion; go_functi       |
| NM_001183.3 | GI:37577154 | H-ATPase subunit; ATPase; H+ transportin     |
| NM_017602.2 | GI:40353201 | synonyms: MGC104871; DKFZp761A052            |
| NM_058163.1 | GI:24308387 | synonym: MGC20451                            |
| NM_001399.4 | GI:54112099 | isoform EDA-A1 is encoded by transcript v    |
| NM_021109.2 | GI:34328943 | thymosin; beta 4; X chromosome; prothyr      |
| NM_014370.2 | GI:63025195 | go_component: cellular component unkn        |
| NM_004651.3 | GI:75992939 | ubiquitin carboxyl-terminal hydrolase; X-li  |
| NM_004208.2 | GI:22202627 | isoform 1 is encoded by transcript variant   |
| NM_201286.2 | GI:69885216 | ubiquitin carboxyl-terminal hydrolase 51;    |
| NM_000328.2 | GI:66932995 | isoform A is encoded by transcript variant   |
| NM_006517.2 | GI:62821799 | solute carrier family 16 (monocarboxylic a   |

## PRODUCT

zinc finger protein 124  
tubulin tyrosine ligase-like family; member 7  
S100 calcium-binding protein A9  
cornichon homolog 3  
brevican isoform 2  
granulysin isoform NKG5  
engrailed homolog 1  
3-oxo-5 alpha-steroid 4-dehydrogenase 2  
hexokinase 2  
mast cell carboxypeptidase A3 precursor  
chromosome 3 open reading frame 60 isoform a  
transient receptor potential cation channel; subfamily C; member 1  
eIF-5A2 protein  
PXR2b protein  
POU domain; class 4; transcription factor 2  
collapsin response mediator protein 1 isoform 2  
cocaine- and amphetamine-regulated transcript  
interferon regulatory factor 4  
complement factor B preproprotein  
H2B histone family; member K  
H3 histone family; member B  
sorting nexin 9  
zinc finger protein 96  
H4 histone family; member J  
actin-like 6B  
GATA binding protein 4  
adrenergic; beta-3-; receptor  
GATA binding protein 4  
neurofilament 3 (150kDa medium)  
LIM homeobox protein 2  
internexin neuronal intermediate filament protein; alpha  
proline-rich acidic protein 1  
glutamate decarboxylase 2  
5-hydroxytryptamine receptor 7 isoform d  
hypothetical protein LOC282969  
cytochrome P450; family 2; subfamily E; polypeptide 1  
early growth response 2 protein  
forkhead box I2  
internexin neuronal intermediate filament protein; alpha  
Wilms tumor 1 isoform C  
furin preproprotein  
forkhead box B1  
forkhead box B1  
heparan sulfate D-glucosaminyl 3-O-sulfotransferase 2  
interferon regulatory factor 8  
Rho family GTPase 2  
solute carrier family 16; member 3  
beta(1;6)-N-acetylglucosaminyltransferase V isoform 1  
carbonic anhydrase IV precursor

homeo box B13  
growth arrest-specific 7 isoform a  
galanin receptor 1  
guanine nucleotide binding protein (G protein); alpha 11 (Gq class)  
coagulation factor II (thrombin) receptor-like 3  
endothelin 3 isoform 1 preproprotein  
syndecan binding protein 2 isoform b  
synaptogyrin 1 isoform 1c  
E74-like factor 4 (ets domain transcription factor)  
HIV TAT specific factor 1  
hypothetical protein LOC29057  
hypothetical protein LOC54885 isoform a  
NADH dehydrogenase (ubiquinone) 1 alpha subcomplex; 1  
ESO3 protein  
ring finger protein 113A  
ephrin-B1 precursor  
hypothetical protein LOC139212  
progesterone receptor membrane component 1  
synaptotagmin-like 4 (granuphilin-a)  
Nance-Horan syndrome protein  
hypothetical protein LOC399668  
ribosomal protein L36a  
myotubularin-related protein 1 isoform 1  
high-mobility group box 3  
glypican 3  
TSC22 domain family; member 3 isoform 2  
deoxyribonuclease I-like 1 precursor  
PHD finger protein 8  
hypothetical protein LOC55593  
JM4 protein  
RNA binding motif protein; X-linked  
basic helix-loop-helix domain containing; class B; 9  
lysosomal-associated membrane protein 2 precursor  
PHD finger protein 16  
monoamine oxidase A  
HIV TAT specific factor 1  
ELK1 protein  
hypothetical protein LOC55086  
oligophrenin 1  
mediator of RNA polymerase II transcription; subunit 12 homolog  
ATPase; H<sup>+</sup> transporting; lysosomal accessory protein 2  
solute carrier family 9 (sodium/hydrogen exchanger); isoform 6  
hypothetical protein LOC399668  
v-raf murine sarcoma 3611 viral oncogene homolog  
brain expressed X-linked 2  
glypican 4  
follicle-stimulating hormone primary response protein 1  
UPF3 regulator of nonsense transcripts homolog B isoform 2  
kinesin family member 4  
BCL6 co-repressor-like 1

ribosomal protein L10  
glycosyltransferase 28 domain containing 1  
phosphatidylinositol polyphosphate 5-phosphatase isoform b  
palmitoylated membrane protein 1  
TSPY-like 2  
WD repeat domain 13 protein  
hypothetical protein LOC51260  
isocitrate dehydrogenase 3 (NAD+) gamma isoform a precursor  
B-cell receptor-associated protein 31  
kaiso  
hydroxyacyl-Coenzyme A dehydrogenase; type II isoform 1  
hypothetical protein LOC54954  
thioredoxin peroxidase  
baculoviral IAP repeat-containing protein 4  
zinc finger; DHC domain containing 15  
phosphorylase kinase; alpha 1 (muscle)  
hypothetical protein LOC84187  
hypothetical protein LOC55841  
emopamil binding protein (sterol isomerase)  
polymerase (DNA-directed); alpha  
solute carrier family 9; member 7  
monoamine oxidase A  
ephrin-B1 precursor  
moesin  
WD repeat domain 45 isoform 1  
PHD finger protein 16  
pyruvate dehydrogenase kinase; isoenzyme 3  
ATPase; H+ transporting; lysosomal accessory protein 1 precursor  
hypothetical protein LOC55593  
hypothetical protein LOC90121  
ectodysplasin A isoform EDA-A1  
thymosin; beta 4  
serine/threonine kinase 23  
ubiquitin specific protease 11  
programmed cell death 8 isoform 1  
ubiquitin specific protease 51  
retinitis pigmentosa GTPase regulator isoform A  
solute carrier family 16; member 2

| DISTANCE_TO_TSS | CPG_ISLAND | CPG_ISLAND_LOCATIONS   | MIR_CPG_ISLAND | MIR_NAMES  |
|-----------------|------------|------------------------|----------------|------------|
| 153             | TRUE       | 1:245401260-245402151  |                |            |
| 731             | TRUE       | 1:84236652-84237966    |                |            |
| 428             | FALSE      |                        |                | cg16139316 |
| 47              | TRUE       | 1:222870113-222872558  |                |            |
| 400             | TRUE       | 1:154878094-154879230  |                |            |
| 378             | FALSE      |                        |                | cg11752275 |
| 858             | TRUE       | 2:119320039-119321504  |                |            |
| 235             | TRUE       | 2:31658633-31660643    |                |            |
| 180             | FALSE      |                        |                | cg18638581 |
| 1247            | FALSE      |                        |                | cg13424229 |
| 247             | TRUE       | 3:49032563-49032797    |                |            |
| 571             | TRUE       | 3:143925285-143926748  |                |            |
| 95              | TRUE       | 3:172108452-172109716  |                |            |
| 718             | TRUE       | 3:181236808-181238032  |                |            |
| 509             | TRUE       | 4:147778503-147781596  |                |            |
| 94              | TRUE       | 4:5944246-5946191      |                |            |
| 438             | TRUE       | 5:71050507-71051626    |                |            |
| 371             | TRUE       | 6:336092-339080        |                |            |
| 532             | FALSE      |                        |                | cg17741572 |
| 5               | TRUE       | 6:26381046-26381970    |                |            |
| 710             | TRUE       | 6:26307702-26308258    |                |            |
| 461             | TRUE       | 6:158163446-158165173  |                |            |
| 98              | TRUE       | 6:28474985-28475928    |                |            |
| 50              | TRUE       | 6:26312577-26313287    |                |            |
| 136             | TRUE       | 7:100091590-100092362  |                |            |
|                 | TRUE       | 8:11598711-11600557    |                |            |
| 709             | TRUE       | 8:37941431-37943204    |                |            |
|                 | TRUE       | 8:11598711-11600557    |                |            |
| 34              | TRUE       | 8:24826692-24829288    |                |            |
| 184             | TRUE       | 9:125813052-125815466  |                |            |
| 295             | TRUE       | 10:105026442-105028852 |                |            |
| 3               | FALSE      |                        |                | cg03743584 |
| 152             | TRUE       | 10:26543757-26547625   |                |            |
| 509             | TRUE       | 10:92606622-92608182   |                |            |
| 446             | TRUE       | 10:135020610-135021994 |                |            |
| 661             | TRUE       | 10:135191138-135192648 |                |            |
| 329             | TRUE       | 10:64244521-64245891   |                |            |
| 16              | TRUE       | 10:129424072-129426344 |                |            |
| 275             | TRUE       | 10:105026442-105028852 |                |            |
|                 | TRUE       | 11:32411271-32413831   |                |            |
| 233             | FALSE      |                        |                | cg26377677 |
| 710             | TRUE       | 15:58083184-58086207   |                |            |
| 320             | TRUE       | 15:58083184-58086207   |                |            |
| 257             | TRUE       | 16:22732005-22734135   |                |            |
| 79              | TRUE       | 16:84489299-84490591   |                |            |
| 180             | TRUE       | 17:38429704-38431262   |                |            |
| 674             | TRUE       | 17:77779304-77780821   |                |            |
| 270             | TRUE       | 17:72375680-72377919   |                |            |
| 396             | TRUE       | 17:55581878-55583315   |                |            |



|      |       |                       |            |
|------|-------|-----------------------|------------|
| 42   | TRUE  | 17:44160495-44161328  |            |
| 395  | TRUE  | 17:10041659-10043517  |            |
| 636  | TRUE  | 18:73090255-73093032  |            |
| 155  | TRUE  | 19:3044235-3046095    |            |
| 58   | FALSE |                       | cg19006008 |
| 153  | TRUE  | 20:57308563-57309693  |            |
| 104  | FALSE |                       | cg16173067 |
| 424  | TRUE  | 22:38075299-38076737  |            |
| 1037 | TRUE  | X:129071186-129073330 |            |
| 205  | TRUE  | X:135406317-135407906 |            |
| 837  | TRUE  | X:53003573-53004951   |            |
| 94   | TRUE  | X:105932462-105933253 |            |
| 179  | TRUE  | X:118888580-118890917 |            |
| 197  | TRUE  | X:153359988-153361104 |            |
| 1047 | TRUE  | X:118888580-118890917 |            |
|      | TRUE  | X:67965268-67967122   |            |
| 5    | TRUE  | X:106335539-106336710 |            |
| 93   | TRUE  | X:118253585-118255522 |            |
| 49   | TRUE  | X:99872942-99873874   |            |
| 41   | TRUE  | X:17302835-17305853   |            |
| 634  | TRUE  | X:134383127-134384321 |            |
| 162  | TRUE  | X:100532246-100532948 |            |
| 518  | TRUE  | X:149611916-149613219 |            |
| 60   | TRUE  | X:149901718-149904046 |            |
| 88   | TRUE  | X:132946499-132947763 |            |
| 174  | TRUE  | X:106905712-106906660 |            |
| 247  | TRUE  | X:153292621-153293883 |            |
| 430  | TRUE  | X:54086783-54088233   |            |
| 620  | TRUE  | X:48699066-48701313   |            |
| 291  | TRUE  | X:48817890-48819021   |            |
| 198  | TRUE  | X:135789863-135790845 |            |
| 57   | TRUE  | X:101862184-101862707 |            |
| 60   | TRUE  | X:119486553-119487414 |            |
| 16   | TRUE  | X:46656361-46658460   |            |
| 60   | TRUE  | X:43400130-43400730   |            |
| 309  | TRUE  | X:135406317-135407906 |            |
| 487  | TRUE  | X:47394182-47395634   |            |
| 43   | TRUE  | X:105741531-105742091 |            |
| 49   | TRUE  | X:67569334-67570801   |            |
| 83   | TRUE  | X:70254864-70255742   |            |
| 488  | TRUE  | X:40324583-40325764   |            |
| 166  | TRUE  | X:134895007-134896000 |            |
| 331  | TRUE  | X:134383127-134384321 |            |
| 1    | TRUE  | X:47305171-47306159   |            |
| 6    | TRUE  | X:102451844-102452762 |            |
| 559  | TRUE  | X:132375857-132378130 |            |
| 1445 | TRUE  | X:100239491-100240120 |            |
| 195  | TRUE  | X:118870555-118871381 |            |
| 268  | TRUE  | X:69426172-69427271   |            |
| 1211 | TRUE  | X:128941358-128946562 |            |

|      |       |                       |
|------|-------|-----------------------|
| 305  | TRUE  | X:153277879-153281110 |
| 54   | TRUE  | X:110810870-110811991 |
| 513  | TRUE  | X:128501680-128502582 |
| 386  | TRUE  | X:153686380-153687406 |
| 45   | TRUE  | X:53127216-53129170   |
| 649  | TRUE  | X:48339681-48341694   |
| 36   | TRUE  | X:75309058-75309844   |
| 183  | TRUE  | X:152712310-152713950 |
| 80   | TRUE  | X:152642005-152643632 |
| 185  | TRUE  | X:119268363-119269844 |
| 107  | TRUE  | X:53477634-53478316   |
| 97   | TRUE  | X:54225446-54226910   |
| 84   | TRUE  | X:23595198-23596007   |
| 21   | TRUE  | X:122821066-122822021 |
| 65   | TRUE  | X:74659346-74660218   |
| 808  | TRUE  | X:71851306-71852273   |
| 29   | TRUE  | X:109131973-109133498 |
| 1092 | TRUE  | X:9942388-9944707     |
| 330  | TRUE  | X:48264674-48265781   |
| 431  | TRUE  | X:24621426-24622402   |
| 496  | TRUE  | X:46502730-46504082   |
| 135  | TRUE  | X:43400130-43400730   |
| 78   | TRUE  | X:67965268-67967122   |
| 228  | TRUE  | X:64803987-64804606   |
| 96   | TRUE  | X:48844077-48845653   |
| 288  | TRUE  | X:46656361-46658460   |
| 342  | TRUE  | X:24392800-24393964   |
| 201  | TRUE  | X:153309132-153310681 |
| 232  | TRUE  | X:48699066-48701313   |
| 199  | TRUE  | X:54483309-54483784   |
| 197  | TRUE  | X:68752319-68753914   |
| 260  | TRUE  | X:12902523-12904636   |
| 30   | TRUE  | X:152699478-152699970 |
| 26   | TRUE  | X:46977105-46978329   |
| 282  | TRUE  | X:129126775-129128085 |
| 148  | TRUE  | X:55531479-55532401   |
| 389  | TRUE  | X:38070900-38072122   |
| 285  | FALSE |                       |

cg06277838

| Patient | Age | Sex | Smoke | Stage        | grade                                                                                                                                                     |
|---------|-----|-----|-------|--------------|-----------------------------------------------------------------------------------------------------------------------------------------------------------|
| No.1    | 70  | M   | Y     | T2aN0M0, Ib  | Adenocarcinoma, Acinar predominant, poorly-moderately differentiated                                                                                      |
| No.2    | 59  | F   | Y     | T3N0M0, IIb  | Adenocarcinoma, Papillary predominant with mucin production, well-differentiated                                                                          |
| No.3    | 49  | F   | Y     | T3N2M0, IIIa | Adenocarcinoma, Solid predominant and Acinar predominant , poorly-moderately differentiated                                                               |
| No.4    | 59  | M   | Y     | T2N1M0, IIb  | Adenocarcinoma, Acinar predominant and Solid predominant with mucin production, poorly-moderately differentiated                                          |
| No.5    | 74  | F   | Y     | T3N2M0,IIIa  | Adenocarcinoma, Acinar predominant, Papillary predominant and Solid predominant mixed subtype , poorly-moderately differentiated                          |
| No.6    | 79  | M   | Y     | T2N0M0, Ib   | Adenocarcinoma, Acinar predominant and Solid predominant mixed subtype, poorly differentiated                                                             |
| No.7    | 69  | F   | N     | T1N0M,Ib     | Adenocarcinoma, Acinar predominant and BAC mixed subtype , poorly-moderately differentiated                                                               |
| No.8    | 70  | M   | N     | T3N0M0, IIb  | Adenocarcinoma, Acinar predominant and Papillary predominant mixed subtype , poorly-moderately differentiated, Intrapulmonary metastases in the same lobe |
| No.9    | 72  | F   | N     | T1N1M0, IIa  | Adenocarcinoma, Acinar predominant and Solid predominant mixed subtype, poorly-moderately                                                                 |

|       |      |   |   |              |                                                                                                                                                    |
|-------|------|---|---|--------------|----------------------------------------------------------------------------------------------------------------------------------------------------|
|       |      |   |   |              | differentiated, cancer embolus in lymphangion                                                                                                      |
| No.10 | 56   | M | N | T2N0M0, Ib   | Adenocarcinoma, Acinar predominant,Invading the visceral pleura                                                                                    |
| No.11 | 51   | F | N | T3N2M0, IIIa | Adenocarcinoma, Solid predominant with mucin production and Acinar predominant mixed subtype, Invading the visceral pleura,Invading the other lobe |
| No.12 | 52 F | F | N | T1N2M0, IIIa | Adenocarcinoma, Acinar predominant and Papillary predominant mixed subtype Invading the visceral pleura, poorly-moderately differentiated          |
